# Supplementary material
Source: PubMed Central journal article supplement (PMC7008001)
Supplement: NIHMS1513091-supplement-1.pdf [file NIHMS1513091-supplement-1.pdf]

Supplemental Table 1. Institutions and PIs participating in LCMC II.

| Institutions Participating in LCMC II           | PI                                          |
|-------------------------------------------------|---------------------------------------------|
| University of Colorado                          | Paul Bunn, M.D.                             |
| The Ohio State University                       | Gregory Otterson, M.D.                      |
| Dana Farber/Brigham and Women's                 | Bruce Johnson, M.D./David Kwiatkowski, M.D. |
| Yale University                                 | Katerina Politi, Ph.D                       |
| Memorial Sloan Kettering Cancer Center          | Mark Kris, M.D.                             |
| University of Pittsburgh                        | Mark Socinski, M.D.                         |
| Johns Hopkins University                        | Charles Rudin, M.D., Ph.D                   |
| Emory University                                | Fadlo Khuri, M.D.                           |
| Moffitt Cancer Center                           | Eric Haura, M.D.                            |
| Massachusetts General Hospital                  | Jeffrey Engelman, M.D.                      |
| Washington University in Saint Louis            | Saiama Wagar, M.D.                          |
| University of Texas Southwestern Medical Center | Joan Schiller, M.D.                         |
| MD Anderson                                     | Bonnie Glisson, M.D.                        |
| University of California Los Angeles            | Edward Garon, M.D.                          |
| Oregon Health and Science University            | Alan Sadler, M.D.                           |
| Vanderbilt University                           | Yu Shyr, Ph.D                               |

Supplemental Table 2. Overview of mutational profiling platforms employed across 16 LCMC2 testing sites.

| Site | MPS* | <u>Genotyping platform</u>   |                         |                      |                |               |
|------|------|------------------------------|-------------------------|----------------------|----------------|---------------|
|      |      | Single base**<br>extension** | Mass<br>spectroscopy*** | Sanger<br>sequencing | Pyrosequencing | Real time PCR |
| 1    | ✓    |                              | ✓                       | ✓                    | ✓              | ✓             |
| 2    | ✓    | ✓                            |                         |                      |                |               |
| 3    | ✓    |                              |                         | ✓                    |                |               |
| 4    | ✓    | ✓                            |                         |                      |                |               |
| 5    | ✓    |                              | ✓                       |                      |                |               |
| 6    | ✓    | ✓                            |                         |                      | ✓              |               |
| 7    | ✓    |                              | ✓                       |                      |                |               |
| 8    | ✓    | ✓                            |                         |                      |                |               |
| 9    | ✓    |                              | ✓                       |                      |                |               |
| 10   | ✓    | ✓                            |                         |                      |                |               |
| 11   | ✓    | ✓                            |                         |                      |                |               |
| 12   | ✓    | ✓                            |                         |                      |                |               |
| 13   | ✓    | ✓                            |                         |                      |                |               |
| 14   |      | ✓                            |                         |                      |                |               |
| 15   | ✓    | ✓                            |                         |                      |                |               |
| 16   |      |                              |                         | ✓                    | ✓              | ✓             |

\*Massively parallel sequencing; multiple methods were used across different sites

\*\*Single base extension genotyping is commercially known as SNaPshot.

\*\*\*Mass spectroscopy genotyping is commercially known as Sequenom.

Supplemental Table 3. Mutations in the core genes assayed in LCMC II.

| <b>Variant</b>          | <b>AA</b> |
|-------------------------|-----------|
| AKT1_c.49G.A            | p.E17K    |
| BRAF_c.1397G.T          | p.G466V   |
| BRAF_c.1406G.A          | p.G469E   |
| BRAF_c.1406G.C          | p.G469A   |
| BRAF_c.1406G.T          | p.G469V   |
| BRAF_c.1781A.G          | p.D594G   |
| BRAF_c.1781A.T          | p.D594G   |
| BRAF_c.1789C.G          | p.L597V   |
| BRAF_c.1790T.G          | p.L597R   |
| BRAF_c.1798G.A          | p.V600M   |
| BRAF_c.1799T.A          | p.V600E   |
| EGFR_c.2125_2127GAA.CAT | p.E709H   |
| EGFR_c.2125G.A          | p.E709K   |
| EGFR_c.2126A.C          | p.E709A   |
| EGFR_c.2126A.G          | p.E709G   |
| EGFR_c.2126A.T          | p.E709V   |
| EGFR_c.2155G.A          | p.G719S   |
| EGFR_c.2155G.T          | p.G719C   |
| EGFR_c.2156G.A          | p.G719D   |
| EGFR_c.2156G.C          | p.G719A   |
| EGFR_c.2281G.T          | p.D761Y   |
| EGFR_c.2303G.T          | p.S768I   |
| EGFR_c.2326C.T          | p.R776G   |
| EGFR_c.2327G.A          | p.R776H   |
| EGFR_c.2369C.T          | p.T790M   |
| EGFR_c.2560A.G          | p.T854A   |
| EGFR_c.2572C.A          | p.L858M   |
| EGFR_c.2573T.G          | p.L858R   |
| EGFR_c.2582T.A          | p.L861Q   |
| EGFR_exon.19.del        | e19del    |
| EGFR_exon.20.ins        | e20ins    |
| ERBB2_c.2264T.C         | p.L755S   |
| ERBB2_c.2305G.C         | p.D769Y   |
| ERBB2_c.2329G.A         | p.V777L   |
| ERBB2_c.2329G.T         | p.V777L   |
| ERBB2_ins.A775          | e20ins    |
| KRAS_c.181C.A           | p.Q61X    |
| KRAS_c.181C.G           | p.Q61E    |
| KRAS_c.182A.C           | p.Q61P    |

|                     |         |
|---------------------|---------|
| KRAS_c.182A.G       | p.Q61R  |
| KRAS_c.182A.T       | p.Q61L  |
| KRAS_c.183A.C       | p.Q61H  |
| KRAS_c.183A.T       | p.Q61H  |
| KRAS_c.34G.A        | p.G12S  |
| KRAS_c.34G.C        | p.G12R  |
| KRAS_c.34G.T        | p.G12C  |
| KRAS_c.35G.A        | p.G12D  |
| KRAS_c.35G.C        | p.G12A  |
| KRAS_c.35G.T        | p.G12V  |
| KRAS_c.37G.A        | p.G13S  |
| KRAS_c.37G.C        | p.G13R  |
| KRAS_c.37G.T        | p.G13C  |
| KRAS_c.38G.A        | p.G13D  |
| KRAS_c.38G.C        | p.G13A  |
| KRAS_c.38G.T        | p.G13V  |
| KRAS_c.436G.A       | p.A146T |
| KRAS_c.436G.C       | p.A146P |
| KRAS_c.437C.T       | p.A146V |
| KRAS_c.180.181TC.CA | p.Q61K  |
| MAP2K1_c.167A.C     | p.Q56P  |
| MAP2K1_c.171G.T     | p.K57N  |
| MAP2K1_c.199G.A     | p.D67N  |
| NRAS_c.181C.A       | p.Q61K  |
| NRAS_c.181C.G       | p.Q61R  |
| NRAS_c.182A.C       | p.Q61P  |
| NRAS_c.182A.G       | p.Q61R  |
| NRAS_c.182A.T       | p.Q61L  |
| NRAS_c.183A.C       | p.Q61H  |
| NRAS_c.183A.G       | p.Q61Q  |
| NRAS_c.183A.T       | p.Q61H  |
| NRAS_c.34G.A        | p.G12S  |
| NRAS_c.34G.C        | p.G12R  |
| NRAS_c.34G.T        | p.G12C  |
| NRAS_c.35G.A        | p.G12D  |
| NRAS_c.35G.C        | p.G12A  |
| NRAS_c.35G.T        | p.G12V  |
| NRAS_c.37G.A        | p.G13S  |
| NRAS_c.37G.C        | p.G13R  |
| NRAS_c.37G.T        | p.G13C  |
| NRAS_c.38G.A        | p.G13D  |

|                  |          |
|------------------|----------|
| NRAS_c.38G.C     | p.G13A   |
| NRAS_c.38G.T     | p.G13V   |
| PIK3CA_c.1035T.A | p.N245K  |
| PIK3CA_c.1035T.G | p.N245K  |
| PIK3CA_c.1258T.C | p.N245K  |
| PIK3CA_c.1624G.A | p.E542K  |
| PIK3CA_c.1624G.C | p.E542Q  |
| PIK3CA_c.1633G.A | p.E545K  |
| PIK3CA_c.1633G.C | p.E545Q  |
| PIK3CA_c.1634A.C | p.E545A  |
| PIK3CA_c.1634A.G | p.E545G  |
| PIK3CA_c.1635G.T | p.E545D  |
| PIK3CA_c.263G.A  | p.R88Q   |
| PIK3CA_c.3129G.T | p.M1043I |
| PIK3CA_c.3139C.T | p.H1047Y |
| PIK3CA_c.3140A.G | p.H1047R |
| PIK3CA_c.3140A.T | p.H1047L |

Supplemental Table 4. Massively parallel sequencing (MPS) assays employed by LCMCII institutions.

| Institution                              | NGS Test Name                      | NGS Methodology                                     | Reference                      |
|------------------------------------------|------------------------------------|-----------------------------------------------------|--------------------------------|
| MSKCC                                    | MSK-IMPACT                         | Custom_Hybrid Capture_HiSeq                         | [1]                            |
| Brigham and Women's Hospital/Dana Farber | OncoPanel                          | Custom_Hybrid Capture_HiSeq                         | [2]                            |
| Wash U                                   | WUCaMP                             | ClearSeq Comprehensive Cancer?_Hybrid Capture_HiSeq | [3]                            |
| U of Colorado                            | Not specified                      | TST26_Amplicon_MiSeq/NextSeq                        |                                |
| Emory                                    | CMP26                              | TST26_Amplicon_MiSeq/NextSeq                        | [4]                            |
| Moffitt                                  | Not specified                      | TST26_Amplicon_MiSeq/NextSeq                        |                                |
| UTSW                                     | Not specified                      | TST26_Amplicon_MiSeq/NextSeq                        |                                |
| MD Anderson                              | Not specified                      | AmpliSeq Cancer HotSpot v2_Amplicon_PGM             | [5, 6]                         |
| Mass General                             | SNaPshot Cancer Genotyping         | AmpliSeq Cancer HotSpot v2_Amplicon_PGM             |                                |
| Ohio State                               | PULMOL                             | AmpliSeq Colon and Lung v2_Amplicon_PGM             |                                |
| Oregon Health & Sciences                 | GeneTrails® NSCLC Genotyping Panel | Custom Amplicon_PGM                                 | Described in Suppl Data of [7] |
| Johns Hopkins                            | Lung Cancer Mutation Panel         | AmpliSeq Cancer HotSpot v2_Amplicon_PGM             |                                |
| UCLA                                     | Lung Cancer Mutation Panel         | AmpliSeq Cancer HotSpot v2_Amplicon_PGM             |                                |
| Pitt                                     | OncoSeq                            | AmpliSeq Cancer HotSpot v2_Amplicon_PGM             |                                |
| Yale                                     | Not specified                      | Amplicon_PGM                                        |                                |

1. Cheng, D.T., et al., *Memorial Sloan Kettering-Integrated Mutation Profiling of Actionable Cancer Targets (MSK-IMPACT): A Hybridization Capture-Based Next-Generation Sequencing Clinical Assay for Solid Tumor Molecular Oncology*. J Mol Diagn, 2015. **17**(3): p. 251-64.
2. Sholl, L.M., et al., *Institutional implementation of clinical tumor profiling on an unselected cancer population*. JCI Insight, 2016. **1**(19): p. e87062.
3. Cottrell, C.E., et al., *Validation of a next-generation sequencing assay for clinical molecular oncology*. J Mol Diagn, 2014. **16**(1): p. 89-105.
4. Fisher, K.E., et al., *Clinical Validation and Implementation of a Targeted Next-Generation Sequencing Assay to Detect Somatic Variants in Non-Small Cell Lung, Melanoma, and Gastrointestinal Malignancies*. J Mol Diagn, 2016. **18**(2): p. 299-315.
5. Singh, R.R., et al., *Clinical validation of a next-generation sequencing screen for mutational hotspots in 46 cancer-related genes*. J Mol Diagn, 2013. **15**(5): p. 607-22.
6. Goswami, R.S., et al., *Identification of Factors Affecting the Success of Next-Generation Sequencing Testing in Solid Tumors*. Am J Clin Pathol, 2016. **145**(2): p. 222-37.

7. Lopez-Chavez, A., et al., *Molecular profiling and targeted therapy for advanced thoracic malignancies: a biomarker-derived, multiarm, multihistology phase II basket trial*. *J Clin Oncol*, 2015. **33**(9): p. 1000-7.
