# Supplementary material
Source: PubMed Central journal article supplement (PMC7008001)
Supplement: NIHMS1513091-supplement-4.pdf [file NIHMS1513091-supplement-4.pdf]

Supplemental Table 7: Cases with two or more oncogenic driver alterations.

| Driver 1                                   | Driver 2                   | Driver 3      | <i>MET</i> : CEP7 ratio | Full genotyping | Targeted therapy      | Comments                                  | Frequency (among all tested cases)**                                     | Frequency (among driver 1 mutation class)***     |
|--------------------------------------------|----------------------------|---------------|-------------------------|-----------------|-----------------------|-------------------------------------------|--------------------------------------------------------------------------|--------------------------------------------------|
| <i>EGFR</i> p.E709A<br><i>EGFR</i> p.L858R | <i>MET</i> amp             |               | 15                      | Y               | Erlotinib             |                                           | 0.4% ( <i>EGFR</i> + <i>MET</i> )<br>0.14% ( <i>EGFR</i> + <i>RETr</i> ) | 2.5% ( <i>MET</i> amp)<br>0.86 % ( <i>RETr</i> ) |
| <i>EGFR</i> p.L858R                        | <i>MET</i> amp             |               | 4.43                    | N               | Erlotinib             |                                           |                                                                          |                                                  |
| <i>EGFR</i> p.L858R                        | <i>MET</i> amp             | <i>RETr</i> * | 2.7                     | N               | Erlotinib             | 27% <i>RETr</i> nuclei by FISH            |                                                                          |                                                  |
| <i>EGFR</i> p.L858R                        | <i>ALK</i> 5' deletion*    |               | --                      | N               | Erlotinib             | <i>ALK</i> IHC negative, no fusion by NGS | 0.1%                                                                     | 1.7%                                             |
| <i>ALKr</i> *                              | <i>EGFR</i> p.I740_K745dup |               | --                      | N               | Crizotinib, ceritinib |                                           | 0.1%                                                                     | 5.5%                                             |
| <i>EGFR</i> ex19del                        | <i>KRAS</i> p.G12D         |               | --                      | N               | Erlotinib             |                                           | 0.1%                                                                     | 2.5%                                             |
| <i>EGFR</i> p.G719S                        | <i>KRAS</i> p.G12V         |               | --                      | N               | none                  |                                           | 0.1%                                                                     |                                                  |
| <i>EGFR</i> ex19del                        | <i>KRAS</i> p.Q61R         |               | --                      | Y               | Erlotinib             |                                           | 0.1%                                                                     |                                                  |
| <i>KRAS</i> p.G12C                         | <i>ROS1r</i> *             |               | --                      | N               | none                  |                                           | 0.2%                                                                     | 0.74%                                            |
| <i>KRAS</i> p.G13C                         | <i>ROS1r</i> *             |               | --                      | N               | none                  | 52% <i>ROS1r</i> nuclei by FISH           |                                                                          |                                                  |
| <i>BRAF</i> p.V600E                        | <i>KRAS</i> p.G12V         |               | --                      | N               | none                  |                                           | 0.1%                                                                     | 3.7%                                             |
| <i>BRAF</i> p.V600E                        | <i>MET</i> amp             |               | 2.5                     | Y               | none                  |                                           | 0.3%                                                                     | 7.4%                                             |
| <i>BRAF</i> p.V600E                        | <i>MET</i> amp             |               | 2                       | Y               | Dabrafenib            |                                           |                                                                          |                                                  |
| <i>KRAS</i> p.G12V                         | <i>NRAS</i> p.Q61R         |               | --                      | Y               | none                  |                                           | 0.1%                                                                     | 0.37%                                            |
| <i>KRAS</i> p.G12V                         | <i>MET</i> amp             |               | 2                       | Y               | none                  |                                           | 1.0%                                                                     | 3.0%                                             |
| <i>KRAS</i> p.G12V                         | <i>MET</i> amp             |               | 3.1                     | Y               | none                  |                                           |                                                                          |                                                  |
| <i>KRAS</i> p.G12A                         | <i>MET</i> amp             |               | 2.77                    | N               | none                  |                                           |                                                                          |                                                  |
| <i>KRAS</i> p.G12V                         | <i>MET</i> amp             |               | 3.26                    | N               | NR                    |                                           |                                                                          |                                                  |
| <i>KRAS</i> p.G12V                         | <i>MET</i> amp             |               | 3.3                     | Y               | none                  |                                           |                                                                          |                                                  |
| <i>KRAS</i> p.G12D                         | <i>MET</i> amp             |               | 2.1                     | Y               | none                  |                                           |                                                                          |                                                  |
| <i>KRAS</i> p.G12V                         | <i>MET</i> amp             |               | 2.1                     | Y               | none                  |                                           |                                                                          |                                                  |
| <i>KRAS</i> p.G12D                         | <i>MET</i> amp             |               | 2.24                    | N               | none                  |                                           |                                                                          |                                                  |

*ALKr* = *ALK* rearranged; *ROS1r* = *ROS1* rearranged; *RETr* = *RET* rearranged; amp = Gene amplification; NR = not reported

\*All rearrangement events here were detected by fluorescence in situ hybridization (FISH).

\*\* Frequency indicates rate of duplicate events within both classes of events and is restricted to cases for which both were tested

\*\*\*Total cases with complete testing for *EGFR* and *MET* FISH = 671, *EGFR* + *ALK* = 805, *EGFR* + *RET* = 767, *EGFR* + *KRAS* = 862, *ROS1* + *KRAS* = 780 *KRAS* + *BRAF* = 860, *KRAS* + *NRAS* = 860, *BRAF* + *MET* FISH = 661, *KRAS* + *MET* FISH = 689

Supplemental Table 8. Comparison of LCMC I and LCMC II.

|                        | <b>LCMCI<br/>n=1007</b> | <b>LCMCII<br/>n=904</b> | <b>P value</b> |
|------------------------|-------------------------|-------------------------|----------------|
| <b>Smoking history</b> |                         |                         |                |
| Never                  | 341 (34%)               | 219 (25%)               | <0.001         |
| Former                 | 589 (59%)               | 556 (62%)               |                |
| Current                | 73 (7%)                 | 115 (13%)               |                |
| <b>Genotype</b>        |                         |                         |                |
| <i>EGFR</i> *          | 225 (23%)               | 136 (16%)               | <0.001         |
| <i>KRAS</i>            | 250 (25%)               | 269 (31%)               | 0.006          |
| <i>ALKr</i>            | 86 (9%)                 | 36 (4%)                 | <0.001         |
| <i>ERBB2</i>           | 24 (3%)                 | 16 (2%)                 | 0.867          |
| <i>BRAF</i> p.V600E    | 17 (2%)                 | 26 (3%)                 | 0.086          |

\*including both sensitizing and other EGFR variants.

\*\*ALKr= ALK rearrangement
