# Supplementary material
Source: PubMed Central journal article supplement (PMC7008001)
Supplement: NIHMS1513091-supplement-5.pdf [file NIHMS1513091-supplement-5.pdf]

## Sample Analysis Flowchart

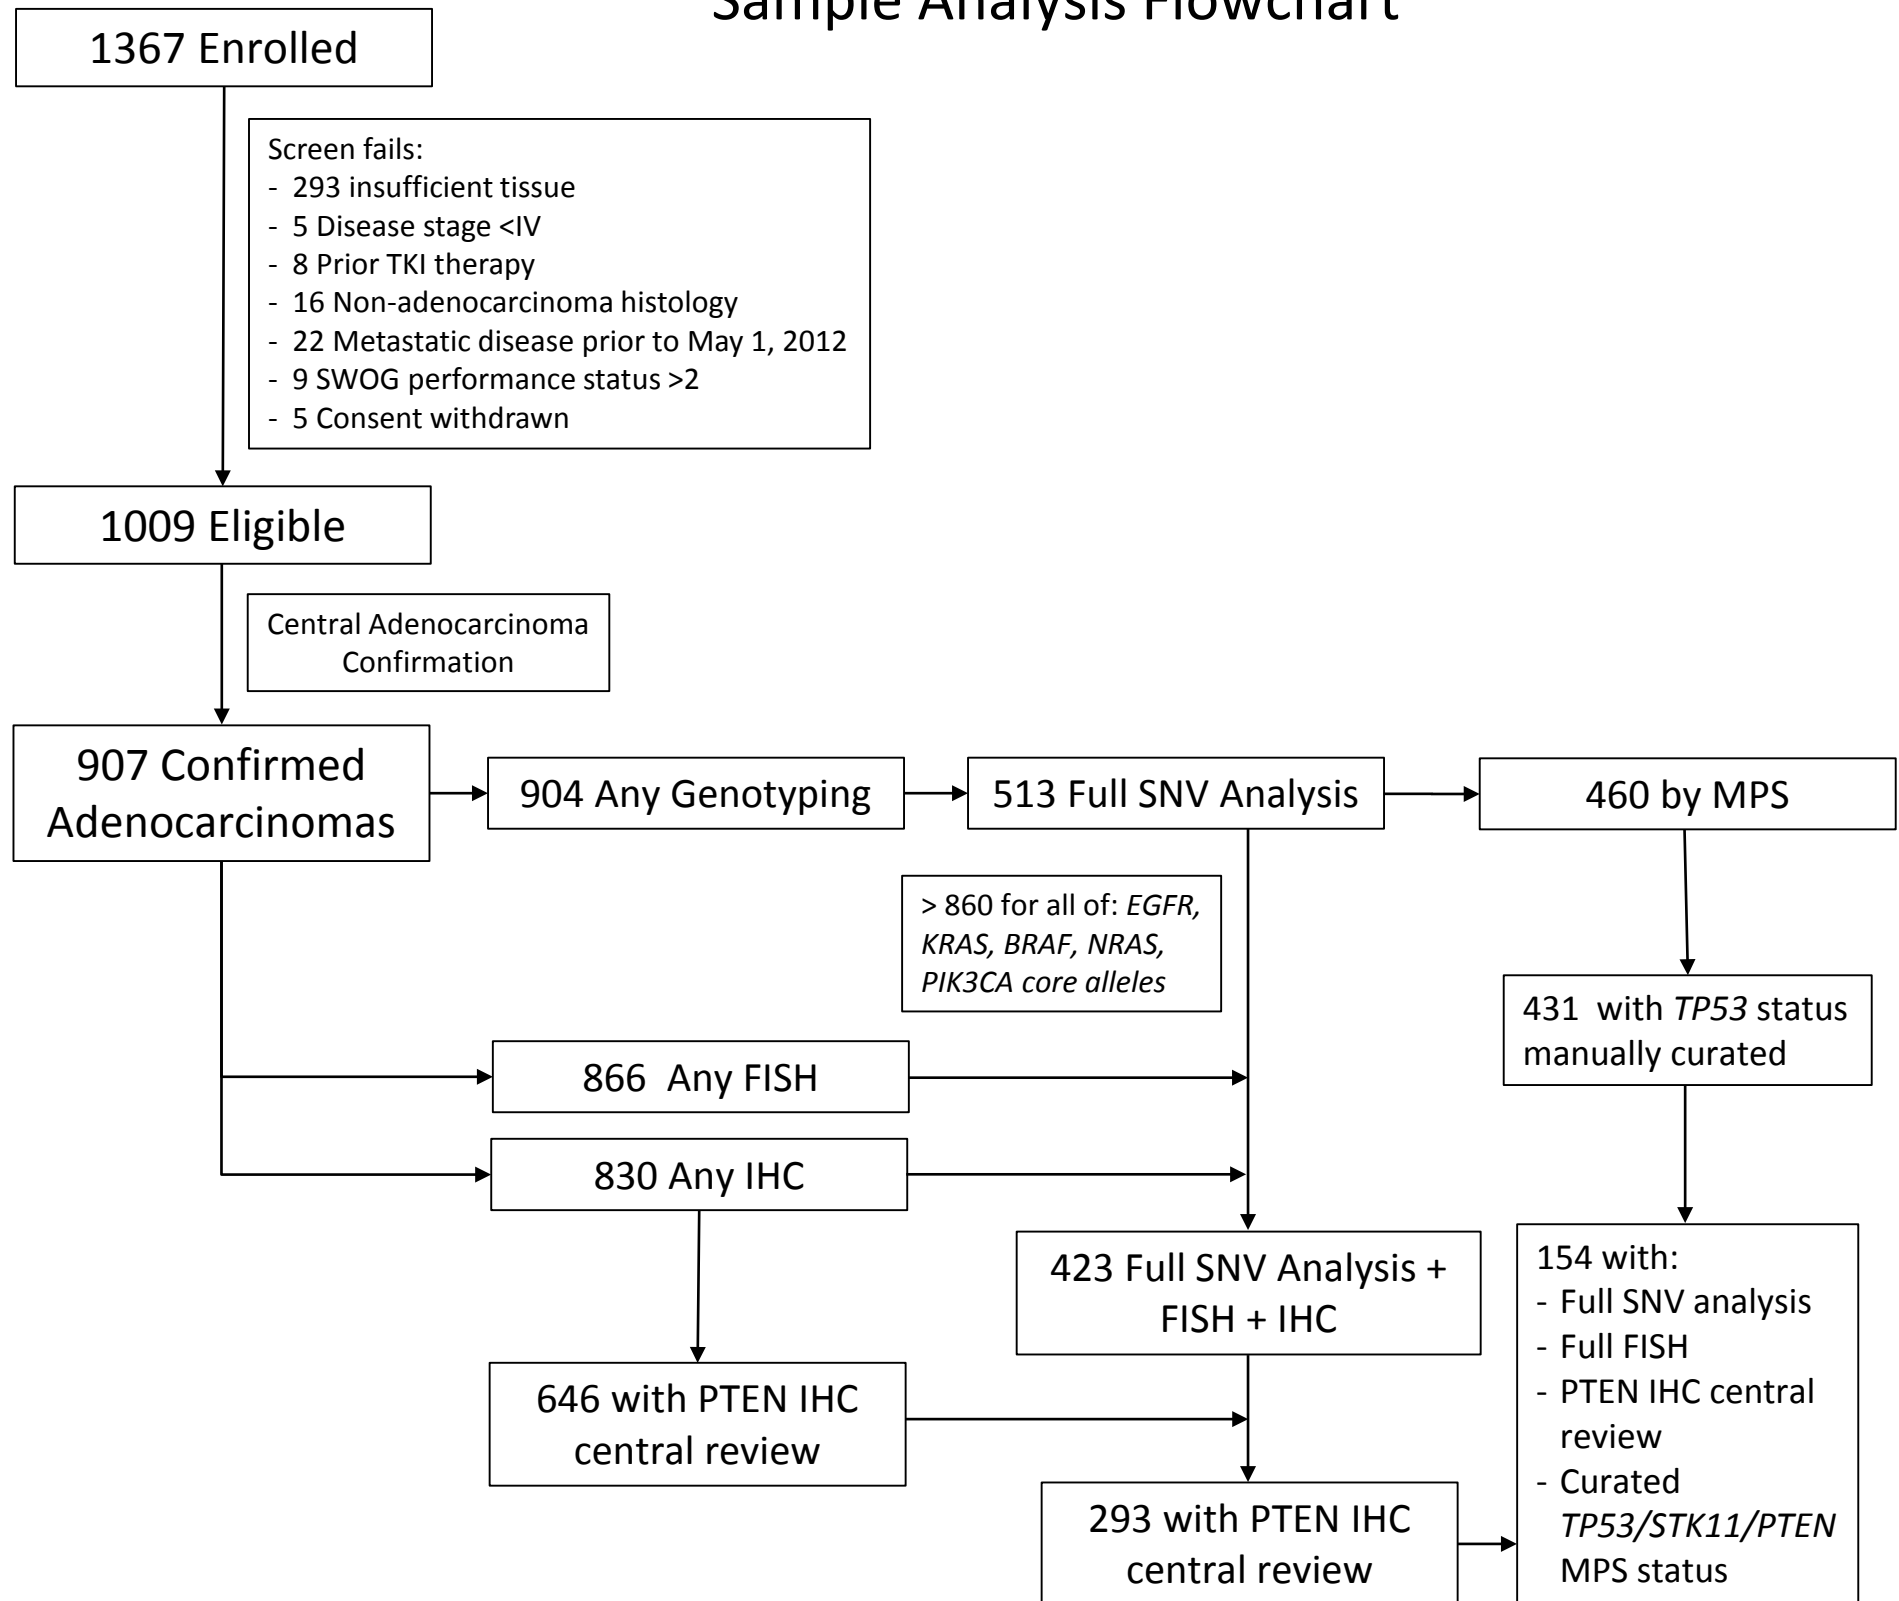



# Supplemental Figure 3

PTEN Immunohistochemistry analysis of LCMC II samples.

Intact

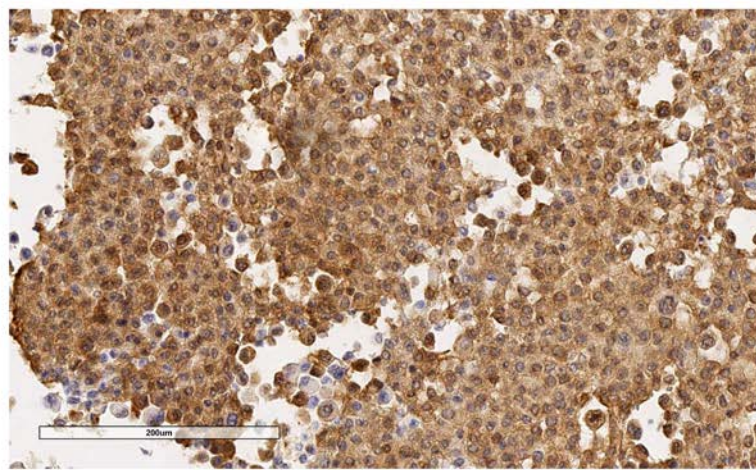

Lost

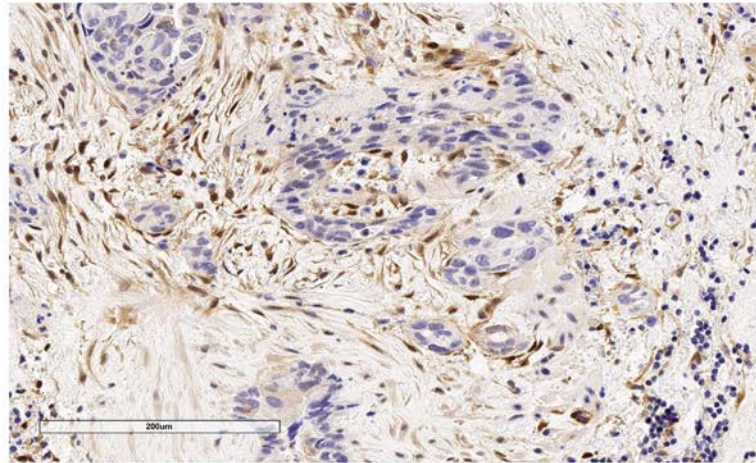

Heterogeneous

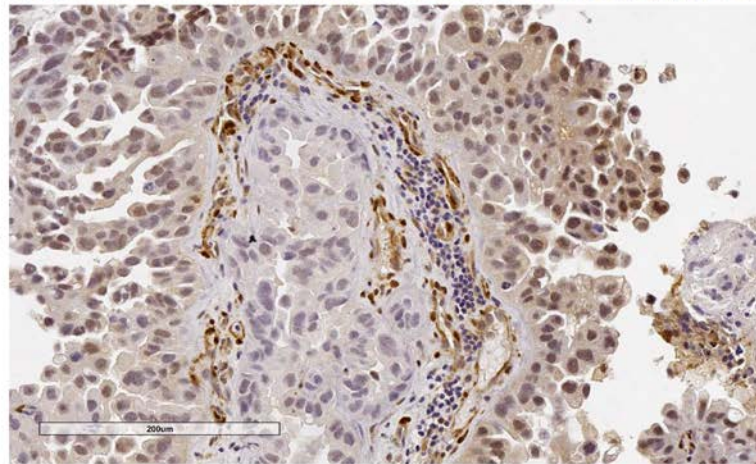

# Supplemental Figure 4

## Mutation Frequency by Mutation and Smoking Status

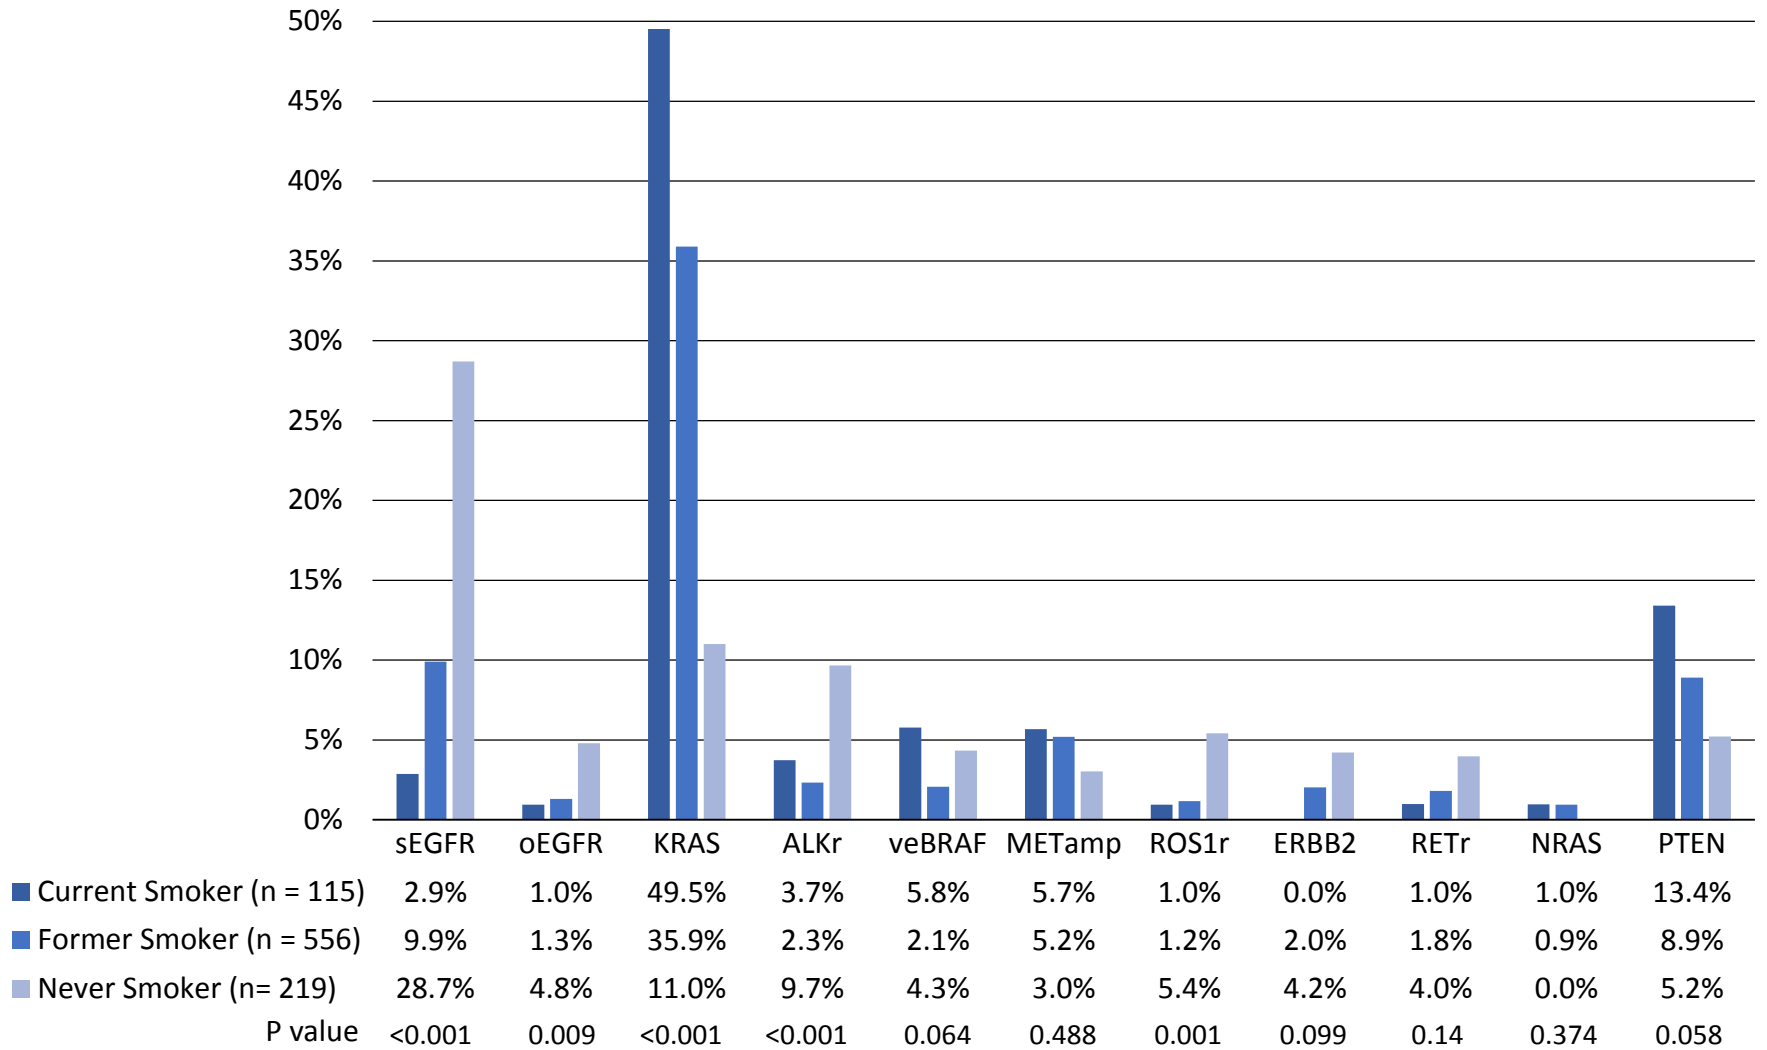

# Supplemental Figure 5

Gene: Any\* (n=944)\*\*

## Any Gene, Mutation Positive (%)

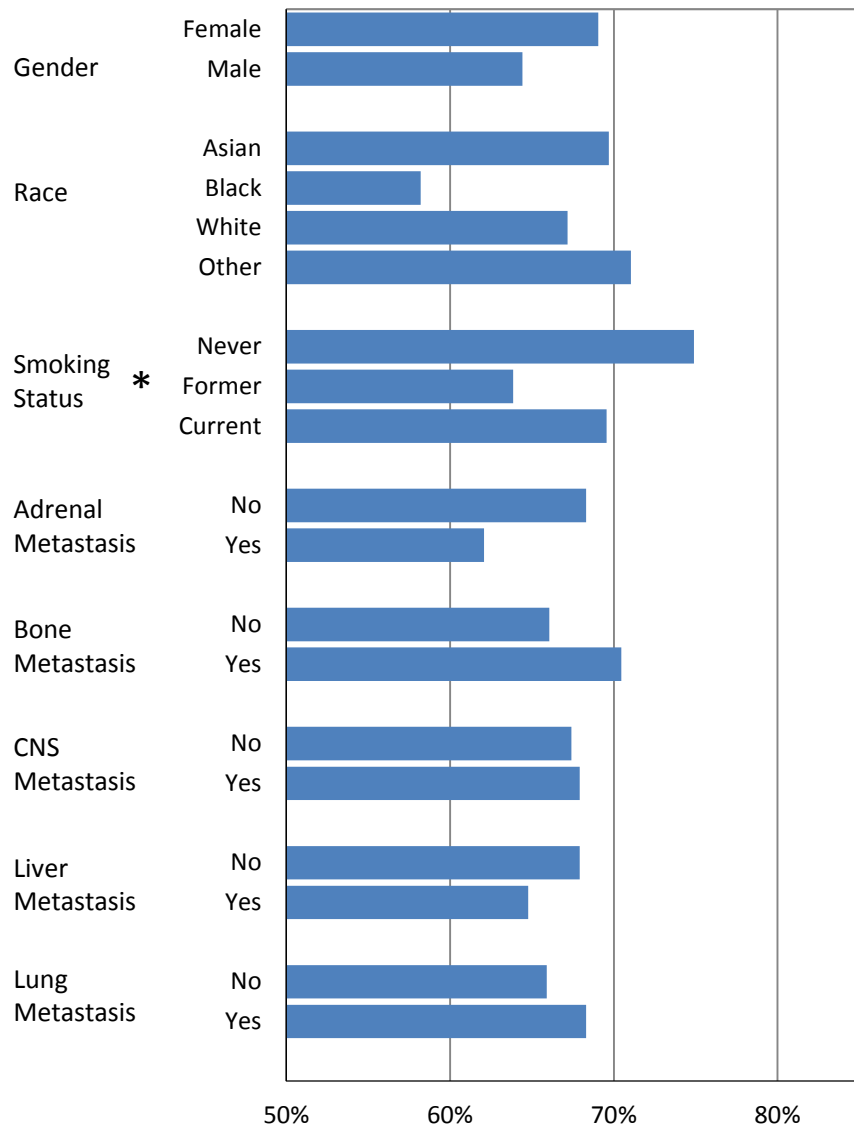

| Variable                | N                          | WT (n=299)     | Mut (n=605)    | P           |
|-------------------------|----------------------------|----------------|----------------|-------------|
| Sex                     | 904                        |                |                | 0.14        |
|                         | Female                     | 51% (151)      | 56% (337)      |             |
|                         | Male                       | 49% (148)      | 44% (268)      |             |
| Race                    | 904                        |                |                | 0.27        |
|                         | Amer Indian/Alaska Native  | 0% (0)         | 0% (3)         |             |
|                         | Asian                      | 3% (10)        | 4% (23)        |             |
|                         | Black/African American     | 9% (28)        | 6% (39)        |             |
|                         | Native Hawaii/Pacific Isl. | 0% (1)         | 0% (0)         |             |
|                         | White                      | 80% (239)      | 81% (489)      |             |
|                         | Not disclosed              | 7% (21)        | 8% (51)        |             |
| Smoker                  | 890                        |                |                | <b>0.01</b> |
|                         | Current                    | 12% (35)       | 13% (80)       |             |
|                         | Former                     | 69% (201)      | 59% (355)      |             |
|                         | Never                      | 19% (55)       | 27% (164)      |             |
| Stage at diagnosis      | 887                        |                |                | 0.06        |
|                         | I                          | 12% (36)       | 8% (49)        |             |
|                         | II                         | 9% (26)        | 6% (34)        |             |
|                         | III                        | 11% (34)       | 11% (65)       |             |
|                         | IV                         | 68% (200)      | 75% (443)      |             |
| Adrenal metastasis      | 863                        |                |                | 0.24        |
|                         | No                         | 88% (246)      | 91% (530)      |             |
|                         | Yes                        | 12% (33)       | 9% (54)        |             |
| Bone metastasis         | 871                        |                |                | 0.20        |
|                         | No                         | 73% (206)      | 68% (401)      |             |
|                         | Yes                        | 27% (78)       | 32% (186)      |             |
| Brain metastasis        | 869                        |                |                | 0.89        |
|                         | No                         | 73% (205)      | 72% (424)      |             |
|                         | Yes                        | 27% (77)       | 28% (163)      |             |
| Liver metastasis        | 864                        |                |                | 0.55        |
|                         | No                         | 89% (249)      | 90% (527)      |             |
|                         | Yes                        | 11% (31)       | 10% (57)       |             |
| Lung metastasis         | 882                        |                |                | 0.45        |
|                         | No                         | 46% (134)      | 44% (259)      |             |
|                         | Yes                        | 54% (155)      | 56% (334)      |             |
| Histopathologic subtype | 788                        |                |                | 0.57        |
|                         | Acinar predominant         | 29% (77)       | 35% (182)      |             |
|                         | Lepidic predominant        | 2% (5)         | 2% (11)        |             |
|                         | Micropapillary predom.     | 0% (0)         | 0% (1)         |             |
|                         | Mucinous                   | 1% (2)         | 1% (4)         |             |
|                         | Papillary predominant      | 1% (2)         | 0% (2)         |             |
|                         | Solid predominant          | 68% (180)      | 62% (322)      |             |
| Age at diagnosis        | 887                        |                |                | <b>0.04</b> |
|                         | (Q1, median, Q3)           | 57.8 65.3 71.0 | 56.1 63.1 69.9 |             |

# Supplemental Figure 5

## BRAF, Mutation Positive (%)

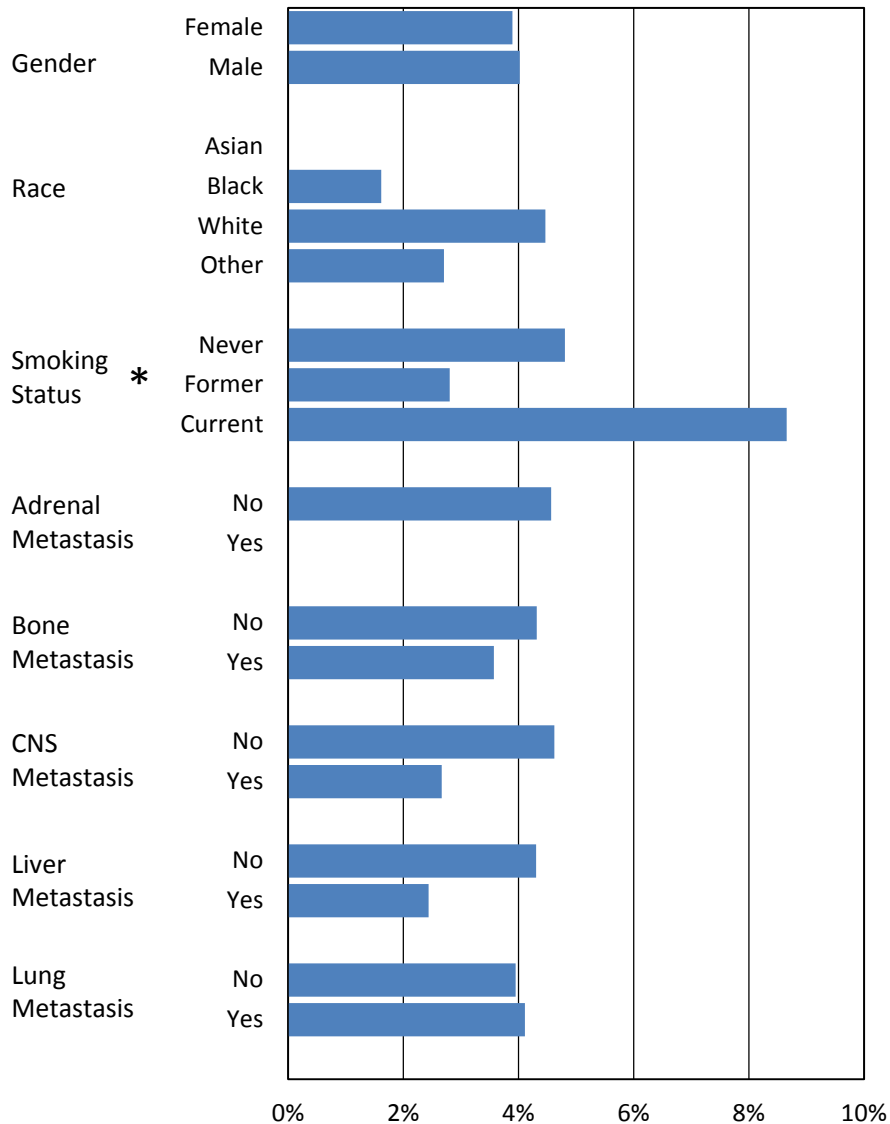

Gene: BRAF (n=860)

| Variable                   | N   | WT (n=826)     | Mut (n=34)     | P           |
|----------------------------|-----|----------------|----------------|-------------|
| Sex                        | 904 |                |                | 0.93        |
| Female                     |     | 54% (444)      | 53% ( 18)      |             |
| Male                       |     | 46% (382)      | 47% ( 16)      |             |
| Race                       | 904 |                |                | 0.7         |
| Amer Indian/Alaska Native  |     | 0% ( 3)        | 0% ( 0)        |             |
| Asian                      |     | 4% (30)        | 0% ( 0)        |             |
| Black/African American     |     | 7% (61)        | 3% ( 1)        |             |
| Native Hawaii/Pacific Isl. |     | 0% ( 1)        | 0% ( 0)        |             |
| White                      |     | 80% (663)      | 91% ( 31)      |             |
| Not disclosed              |     | 8% ( 68)       | 6% ( 2)        |             |
| Smoker                     | 890 |                |                | <b>0.02</b> |
| Current                    |     | 12% ( 95)      | 26% ( 9)       |             |
| Former                     |     | 64% (520)      | 44% ( 15)      |             |
| Never                      |     | 24% (198)      | 29% ( 10)      |             |
| Stage at diagnosis         | 887 |                |                | 0.92        |
| I                          |     | 10% ( 80)      | 12% ( 4)       |             |
| II                         |     | 7% ( 55)       | 9% ( 3)        |             |
| III                        |     | 11% ( 90)      | 9% ( 3)        |             |
| IV                         |     | 72% (585)      | 71% ( 24)      |             |
| Adrenal metastasis         | 863 |                |                | 0.05        |
| No                         |     | 90% (711)      | 100% ( 34)     |             |
| Yes                        |     | 10% ( 79)      | 0% ( 0)        |             |
| Bone metastasis            | 871 |                |                | 0.62        |
| No                         |     | 70% (554)      | 74% ( 25)      |             |
| Yes                        |     | 30% (243)      | 26% ( 9)       |             |
| Brain metastasis           | 869 |                |                | 0.21        |
| No                         |     | 73% (578)      | 82% ( 28)      |             |
| Yes                        |     | 27% (219)      | 18% ( 6)       |             |
| Liver metastasis           | 864 |                |                | 0.42        |
| No                         |     | 90% (711)      | 94% ( 32)      |             |
| Yes                        |     | 10% ( 80)      | 6% ( 2)        |             |
| Lung metastasis            | 882 |                |                | 0.90        |
| No                         |     | 45% (365)      | 44% ( 15)      |             |
| Yes                        |     | 55% (443)      | 56% ( 19)      |             |
| Histopathologic subtype    | 788 |                |                | 0.07        |
| Acinar predominant         |     | 34% (244)      | 21% ( 6)       |             |
| Lepidic predominant        |     | 2% ( 16)       | 0% ( 0)        |             |
| Micropapillary predom.     |     | 0% ( 1)        | 0% ( 0)        |             |
| Mucinous                   |     | 1% ( 5)        | 4% ( 1)        |             |
| Papillary predominant      |     | 0% ( 3)        | 4% ( 1)        |             |
| Solid predominant          |     | 63% (458)      | 71% ( 20)      |             |
| Age at diagnosis           | 887 |                |                | 0.59        |
| (Q1, median, Q3)           |     | 56.4 63.8 70.4 | 58.7 63.5 70.1 |             |

# Supplemental Figure 5

## EGFR, Mutation Positive (%)

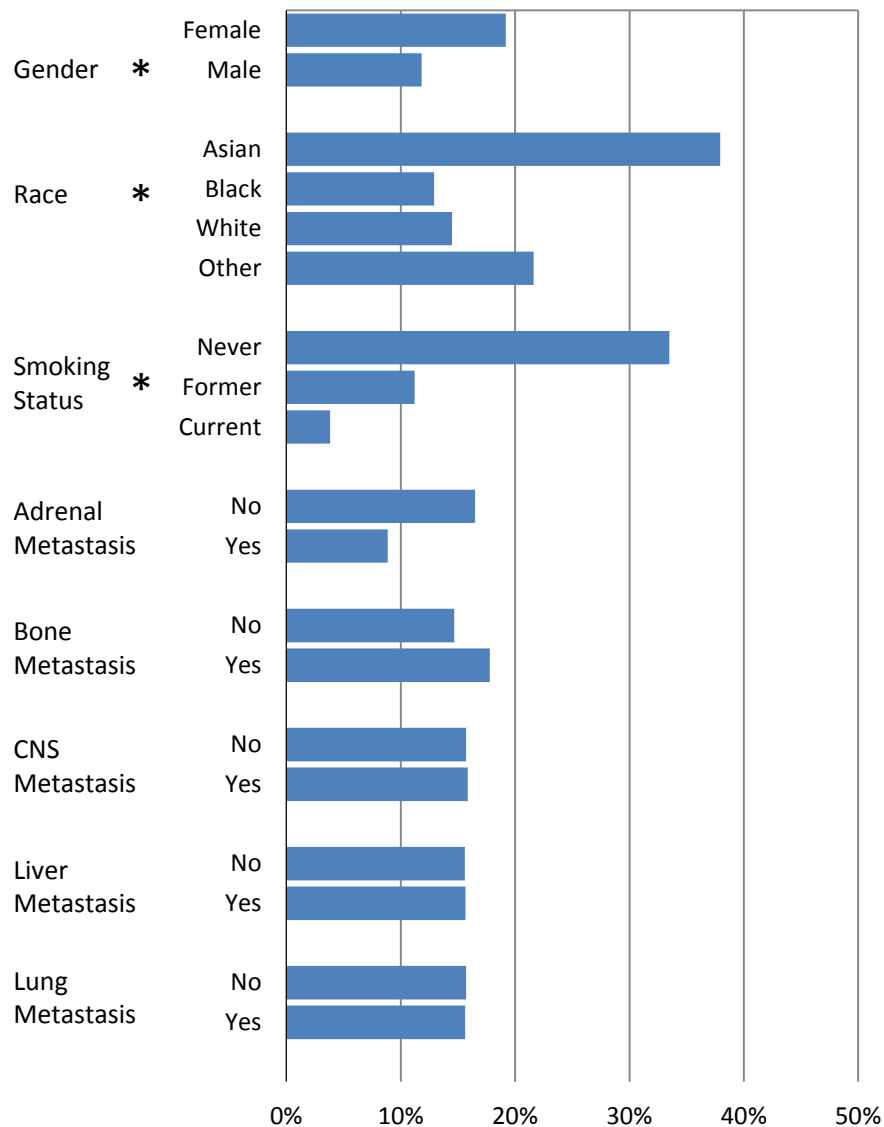

Gene: EGFR (n=862)

| Variable                | N                          | WT (n=726)     | Mut (n=136)    | P                |
|-------------------------|----------------------------|----------------|----------------|------------------|
| Sex                     | 904                        |                |                | <b>0.003</b>     |
|                         | Female                     | 52% (375)      | 65% ( 89)      |                  |
|                         | Male                       | 48% (351)      | 35% ( 47)      |                  |
| Race                    | 904                        |                |                | <b>0.009</b>     |
|                         | Amer Indian/Alaska Native  | 0% ( 3)        | 0% ( 0)        |                  |
|                         | Asian                      | 2% ( 18)       | 8% ( 11)       |                  |
|                         | Black/African American     | 7% ( 54)       | 6% ( 8)        |                  |
|                         | Native Hawaii/Pacific Isl. | 0% ( 1)        | 0% ( 0)        |                  |
|                         | White                      | 82% (596)      | 74% (101)      |                  |
|                         | Not disclosed              | 7% ( 54)       | 12% ( 16)      |                  |
| Smoker                  | 890                        |                |                | <b>&lt;0.001</b> |
|                         | Current                    | 14% (101)      | 3% ( 4)        |                  |
|                         | Former                     | 66% (475)      | 45% ( 60)      |                  |
|                         | Never                      | 19% (139)      | 52% ( 70)      |                  |
| Stage at diagnosis      | 887                        |                |                | <b>0.002</b>     |
|                         | I                          | 11% ( 79)      | 4% ( 5)        |                  |
|                         | II                         | 8% ( 54)       | 2% ( 3)        |                  |
|                         | III                        | 11% ( 82)      | 8% ( 11)       |                  |
|                         | IV                         | 70% (499)      | 85% (112)      |                  |
| Adrenal metastasis      | 863                        |                |                | 0.08             |
|                         | No                         | 90% (623)      | 95% (123)      |                  |
|                         | Yes                        | 10% ( 72)      | 5% ( 7)        |                  |
| Bone metastasis         | 871                        |                |                | 0.26             |
|                         | No                         | 70% (494)      | 65% ( 85)      |                  |
|                         | Yes                        | 30% (208)      | 35% ( 45)      |                  |
| Brain metastasis        | 869                        |                |                | 1                |
|                         | No                         | 73% (510)      | 73% ( 95)      |                  |
|                         | Yes                        | 27% (191)      | 27% ( 36)      |                  |
| Liver metastasis        | 864                        |                |                | 1                |
|                         | No                         | 90% (627)      | 90% (116)      |                  |
|                         | Yes                        | 10% ( 70)      | 10% ( 13)      |                  |
| Lung metastasis         | 882                        |                |                | 1                |
|                         | No                         | 45% (322)      | 45% ( 60)      |                  |
|                         | Yes                        | 55% (389)      | 55% ( 72)      |                  |
| Histopathologic subtype | 788                        |                |                | 0.48             |
|                         | Acinar predominant         | 32% (203)      | 41% ( 47)      |                  |
|                         | Lepidic predominant        | 2% ( 14)       | 2% ( 2)        |                  |
|                         | Micropapillary predom.     | 0% ( 1)        | 0% ( 0)        |                  |
|                         | Mucinous                   | 1% ( 5)        | 1% ( 1)        |                  |
|                         | Papillary predominant      | 1% ( 4)        | 0% ( 0)        |                  |
|                         | Solid predominant          | 65% (415)      | 57% ( 65)      |                  |
| Age at diagnosis        | 887                        |                |                | 0.17             |
|                         | (Q1, median, Q3)           | 56.7 63.8 70.7 | 55.3 63.0 68.8 |                  |

# Supplemental Figure 5

## ERBB2, Mutation Positive(%)

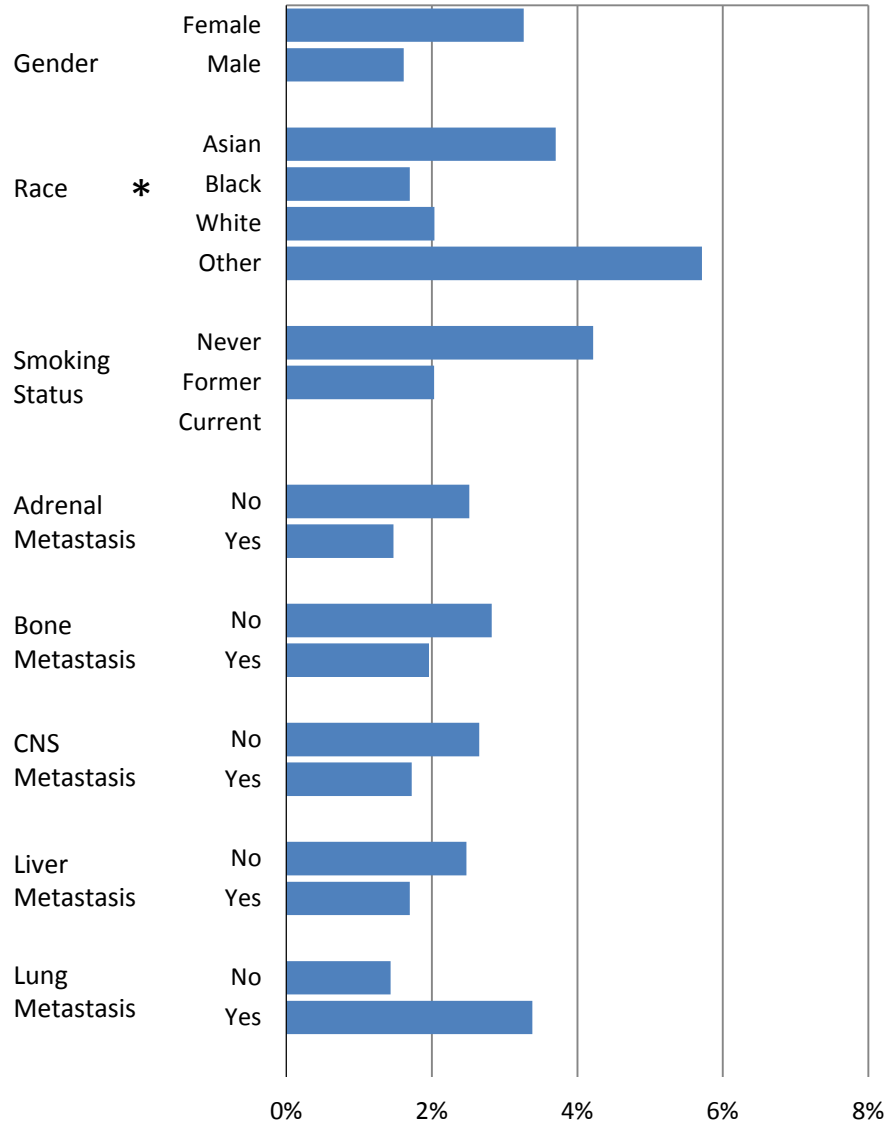

Gene: ERBB2 (n=647)

| Variable                   | N   | WT (n=631)     | Mut (n=16)     | P           |
|----------------------------|-----|----------------|----------------|-------------|
| Sex                        | 904 |                |                | 0.18        |
| Female                     |     | 52% (326)      | 69% ( 11)      |             |
| Male                       |     | 48% (305)      | 31% ( 5)       |             |
| Race                       | 904 |                |                | <b>0.02</b> |
| Amer Indian/Alaska Native  |     | 0% ( 2)        | 6% ( 1)        |             |
| Asian                      |     | 4% ( 26)       | 6% ( 1)        |             |
| Black/African American     |     | 9% ( 58)       | 6% ( 1)        |             |
| Native Hawaii/Pacific Isl. |     | 0% ( 1)        | 0% ( 0)        |             |
| White                      |     | 76% (481)      | 62% ( 10)      |             |
| Not disclosed              |     | 10% ( 63)      | 19% ( 3)       |             |
| Smoker                     | 890 |                |                | 0.1         |
| Current                    |     | 13% ( 80)      | 0% ( 0)        |             |
| Former                     |     | 62% (386)      | 53% ( 8)       |             |
| Never                      |     | 25% (159)      | 47% ( 7)       |             |
| Stage at diagnosis         | 887 |                |                | 0.26        |
| I                          |     | 8% ( 51)       | 19% ( 3)       |             |
| II                         |     | 5% ( 32)       | 6% ( 1)        |             |
| III                        |     | 12% ( 76)      | 0% ( 0)        |             |
| IV                         |     | 74% (459)      | 75% ( 12)      |             |
| Adrenal metastasis         | 863 |                |                | 0.6         |
| No                         |     | 89% (543)      | 93% ( 14)      |             |
| Yes                        |     | 11% ( 67)      | 7% ( 1)        |             |
| Bone metastasis            | 871 |                |                | 0.52        |
| No                         |     | 67% (413)      | 75% ( 12)      |             |
| Yes                        |     | 33% (200)      | 25% ( 4)       |             |
| Brain metastasis           | 869 |                |                | 0.5         |
| No                         |     | 72% (441)      | 80% ( 12)      |             |
| Yes                        |     | 28% (171)      | 20% ( 3)       |             |
| Liver metastasis           | 864 |                |                | 0.71        |
| No                         |     | 90% (552)      | 93% ( 14)      |             |
| Yes                        |     | 10% ( 58)      | 7% ( 1)        |             |
| Lung metastasis            | 882 |                |                | 0.12        |
| No                         |     | 44% (275)      | 25% ( 4)       |             |
| Yes                        |     | 56% (343)      | 75% ( 12)      |             |
| Histopathologic subtype    | 788 |                |                | 0.82        |
| Acinar predominant         |     | 31% (169)      | 50% ( 6)       |             |
| Lepidic predominant        |     | 2% ( 11)       | 0% ( 0)        |             |
| Micropapillary predom.     |     | 0% ( 1)        | 0% ( 0)        |             |
| Mucinous                   |     | 1% ( 6)        | 0% ( 0)        |             |
| Papillary predominant      |     | 0% ( 2)        | 0% ( 0)        |             |
| Solid predominant          |     | 65% (357)      | 50% ( 6)       |             |
| Age at diagnosis           | 887 |                |                | 0.43        |
| (Q1, median, Q3)           |     | 56.6 63.0 69.5 | 54.7 68.0 71.9 |             |



# Supplemental Figure 5

## KRAS, Mutation Positive (%)

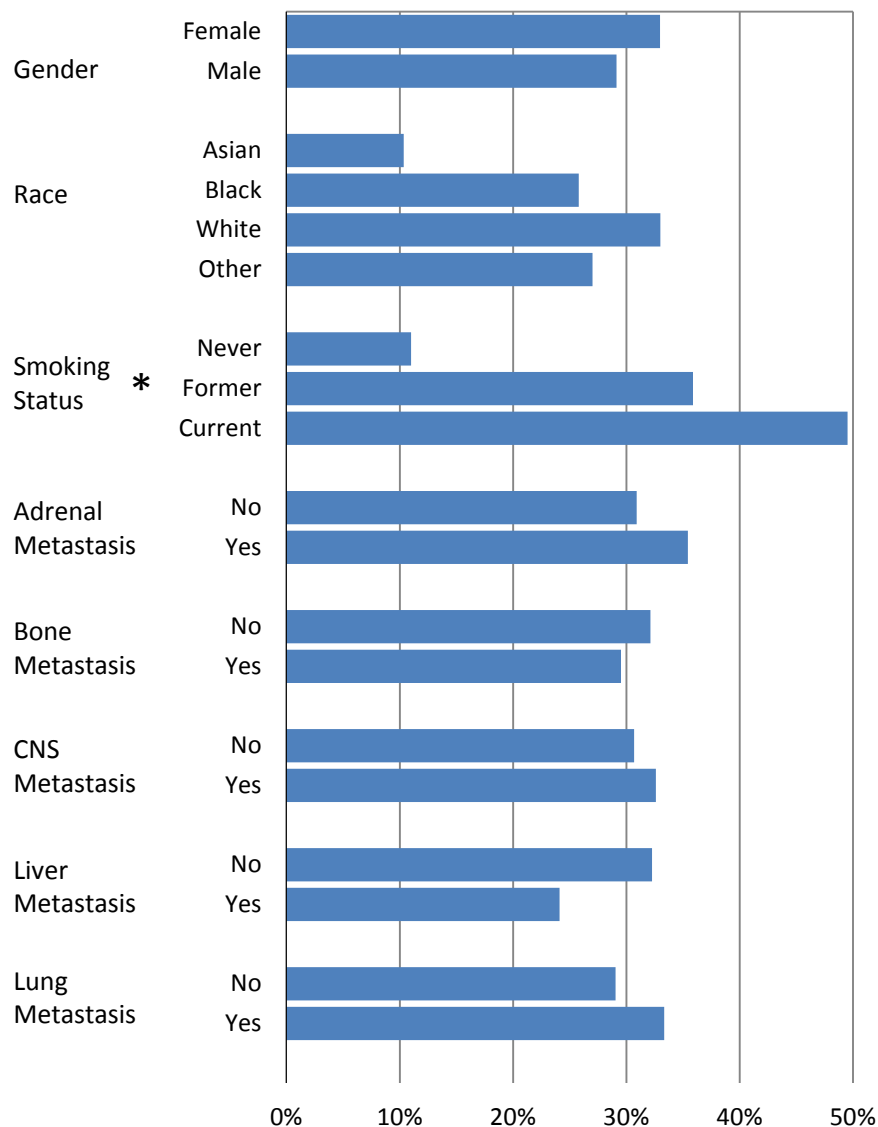

Gene: KRAS (n=862)

| Variable                   | N   | WT (n=593)     | Mut (n=269)    | P                |
|----------------------------|-----|----------------|----------------|------------------|
| Sex                        | 904 |                |                | 0.23             |
| Female                     |     | 52% (311)      | 57% (153)      |                  |
| Male                       |     | 48% (282)      | 43% (116)      |                  |
| Race                       | 904 |                |                | 0.05             |
| Amer Indian/Alaska Native  |     | 0% ( 1)        | 1% ( 2)        |                  |
| Asian                      |     | 4% ( 26)       | 1% ( 3)        |                  |
| Black/African American     |     | 8% ( 46)       | 6% ( 16)       |                  |
| Native Hawaii/Pacific Isl. |     | 0% ( 1)        | 0% ( 0)        |                  |
| White                      |     | 79% (467)      | 86% (230)      |                  |
| Not disclosed              |     | 9% ( 52)       | 7% ( 18)       |                  |
| Smoker                     | 890 |                |                | <b>&lt;0.001</b> |
| Current                    |     | 9% ( 53)       | 19% ( 52)      |                  |
| Former                     |     | 59% (343)      | 72% (192)      |                  |
| Never                      |     | 32% (186)      | 9% ( 23)       |                  |
| Stage at diagnosis         | 887 |                |                | 0.77             |
| I                          |     | 10% ( 56)      | 11% ( 28)      |                  |
| II                         |     | 6% ( 37)       | 8% ( 20)       |                  |
| III                        |     | 11% ( 62)      | 12% ( 31)      |                  |
| IV                         |     | 73% (428)      | 70% (184)      |                  |
| Adrenal metastasis         | 863 |                |                | 0.41             |
| No                         |     | 91% (516)      | 89% (231)      |                  |
| Yes                        |     | 9% ( 51)       | 11% ( 28)      |                  |
| Bone metastasis            | 871 |                |                | 0.46             |
| No                         |     | 69% (393)      | 71% (186)      |                  |
| Yes                        |     | 31% (179)      | 29% ( 75)      |                  |
| Brain metastasis           | 869 |                |                | 0.6              |
| No                         |     | 73% (420)      | 72% (186)      |                  |
| Yes                        |     | 27% (153)      | 28% ( 74)      |                  |
| Liver metastasis           | 864 |                |                | 0.13             |
| No                         |     | 89% (504)      | 92% (240)      |                  |
| Yes                        |     | 11% ( 63)      | 8% ( 20)       |                  |
| Lung metastasis            | 882 |                |                | 0.18             |
| No                         |     | 47% (271)      | 42% (111)      |                  |
| Yes                        |     | 53% (308)      | 58% (154)      |                  |
| Histopathologic subtype    | 788 |                |                | 0.06             |
| Acinar predominant         |     | 31% (160)      | 37% ( 90)      |                  |
| Lepidic predominant        |     | 1% ( 7)        | 4% ( 9)        |                  |
| Micropapillary predom.     |     | 0% ( 1)        | 0% ( 0)        |                  |
| Mucinous                   |     | 1% ( 5)        | 0% ( 1)        |                  |
| Papillary predominant      |     | 1% ( 3)        | 0% ( 1)        |                  |
| Solid predominant          |     | 66% (338)      | 58% (142)      |                  |
| Age at diagnosis           | 887 |                |                | 0.18             |
| (Q1, median, Q3)           |     | 55.9 63.6 70.1 | 57.4 63.9 71.0 |                  |

# Supplemental Figure 5

## ALKr Positive, (%)

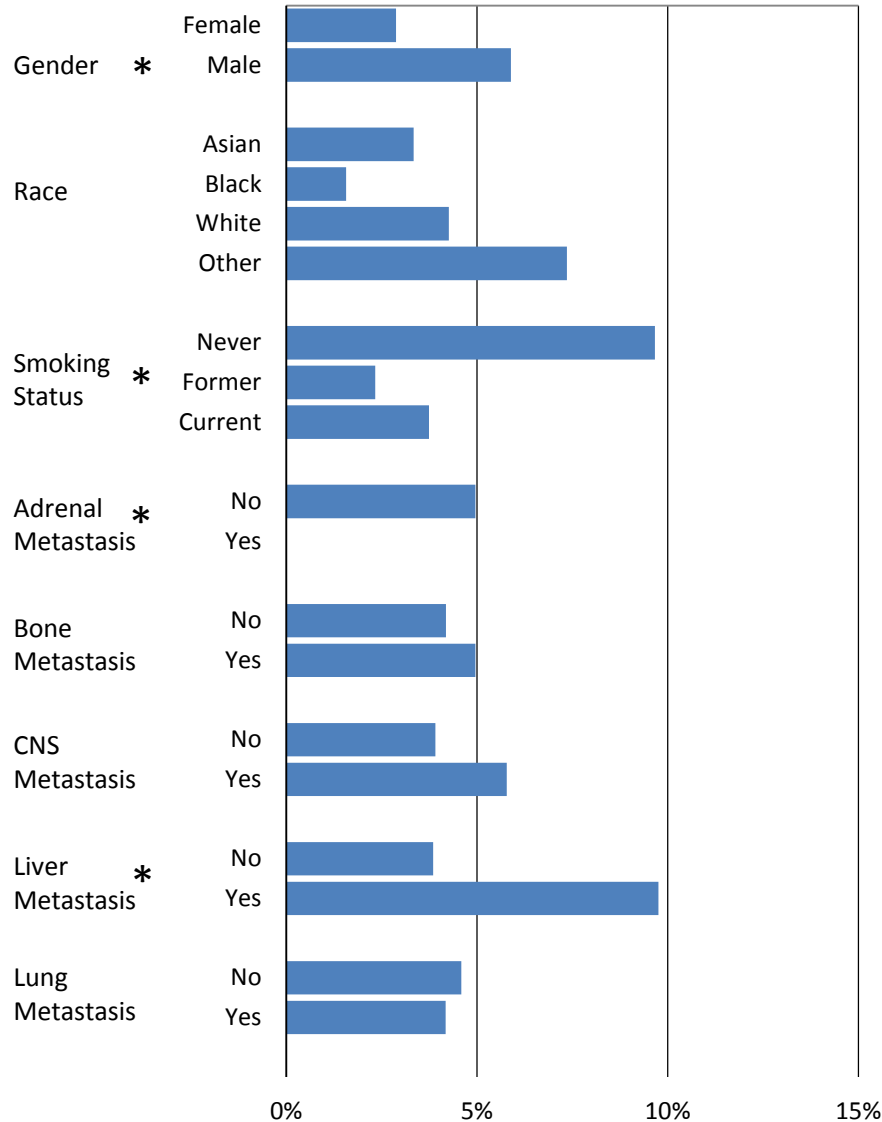

Gene: ALK (rearrangement) (n=843)

| Variable                | N   | WT (n=807)                 | Mut (n=36)     | P                |
|-------------------------|-----|----------------------------|----------------|------------------|
| Sex                     | 904 |                            |                | <b>0.03</b>      |
|                         |     | Female                     | 54% (439)      | 36% (13)         |
|                         |     | Male                       | 46% (368)      | 64% (23)         |
| Race                    | 904 |                            |                | 0.67             |
|                         |     | Amer Indian/Alaska Native  | 0% (2)         | 0% (0)           |
|                         |     | Asian                      | 4% (29)        | 3% (1)           |
|                         |     | Black/African American     | 8% (63)        | 3% (1)           |
|                         |     | Native Hawaii/Pacific Isl. | 0% (1)         | 0% (0)           |
|                         |     | White                      | 7% (60)        | 14% (5)          |
|                         |     | Not disclosed              | 81% (652)      | 81% (29)         |
| Smoker                  | 890 |                            |                | <b>&lt;0.001</b> |
|                         |     | Current                    | 13% (103)      | 11% (4)          |
|                         |     | Former                     | 63% (504)      | 33% (12)         |
|                         |     | Never                      | 24% (187)      | 56% (20)         |
| Stage at diagnosis      | 887 |                            |                | <b>0.02</b>      |
|                         |     | I                          | 10% (79)       | 0% (0)           |
|                         |     | II                         | 7% (58)        | 0% (0)           |
|                         |     | III                        | 11% (88)       | 23% (8)          |
|                         |     | IV                         | 72% (570)      | 77% (27)         |
| Adrenal metastasis      | 863 |                            |                | <b>0.04</b>      |
|                         |     | No                         | 89% (690)      | 100% (36)        |
|                         |     | Yes                        | 11% (83)       | 0% (0)           |
| Bone metastasis         | 871 |                            |                | 0.62             |
|                         |     | No                         | 71% (550)      | 67% (24)         |
|                         |     | Yes                        | 29% (230)      | 33% (12)         |
| Brain metastasis        | 869 |                            |                | 0.25             |
|                         |     | No                         | 73% (566)      | 64% (23)         |
|                         |     | Yes                        | 27% (212)      | 36% (13)         |
| Liver metastasis        | 864 |                            |                | <b>0.01</b>      |
|                         |     | No                         | 90% (700)      | 78% (28)         |
|                         |     | Yes                        | 10% (74)       | 22% (8)          |
| Lung metastasis         | 882 |                            |                | 0.78             |
|                         |     | No                         | 45% (354)      | 47% (17)         |
|                         |     | Yes                        | 55% (436)      | 53% (19)         |
| Histopathologic subtype | 788 |                            |                | 0.91             |
|                         |     | Acinar predominant         | 33% (231)      | 29% (8)          |
|                         |     | Lepidic predominant        | 2% (16)        | 0% (0)           |
|                         |     | Micropapillary predom.     | 0% (1)         | 0% (0)           |
|                         |     | Mucinous                   | 1% (6)         | 0% (0)           |
|                         |     | Papillary predominant      | 1% (4)         | 0% (0)           |
|                         |     | Solid predominant          | 63% (447)      | 71% (20)         |
| Age at diagnosis        | 887 |                            |                | <b>&lt;0.001</b> |
|                         |     | (Q1, median, Q3)           | 56.9 63.9 70.5 | 45.8 55.6 61.7   |

# Supplemental Figure 5

## METamp, positive (%)

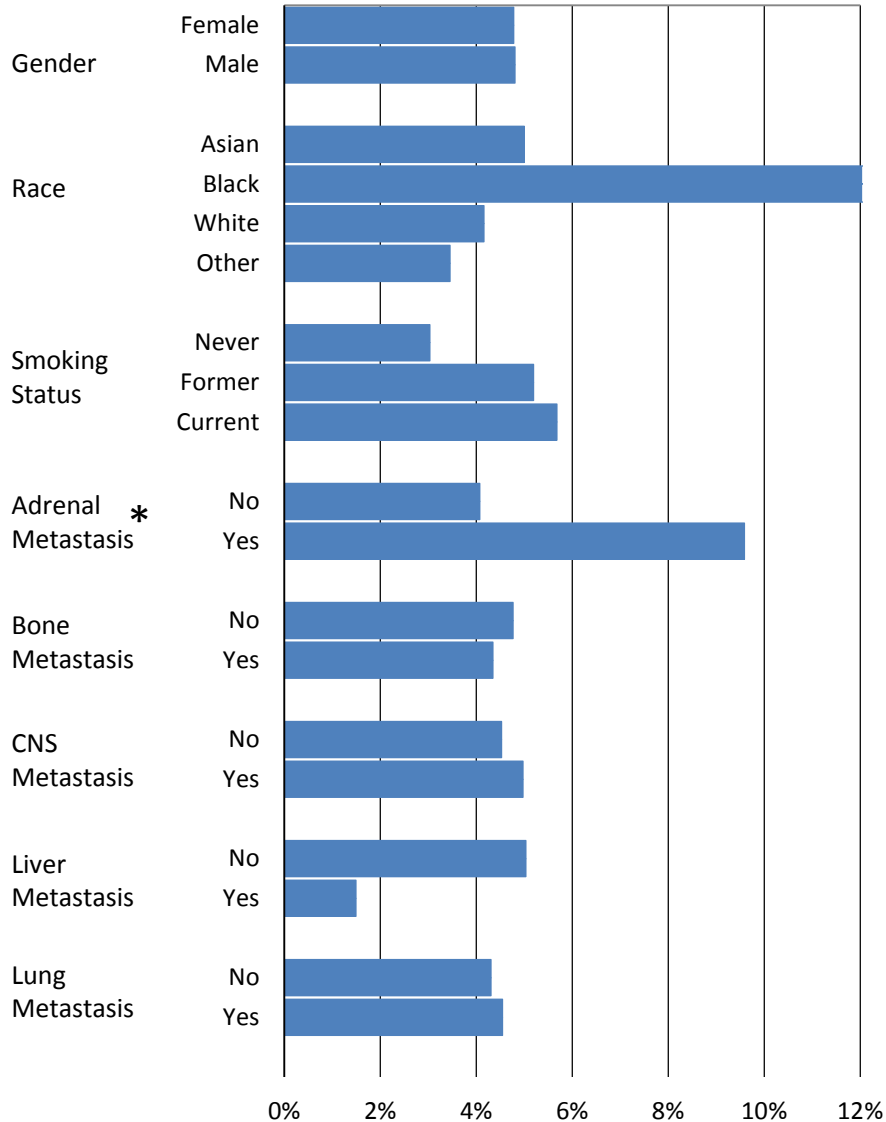

Gene: MET (amplification) (n=689)

| Variable                | N   | WT (n=656)                 | Mut (n=33)     | P              |
|-------------------------|-----|----------------------------|----------------|----------------|
| Sex                     | 904 |                            |                | 1              |
|                         |     | Female                     | 52% (339)      | 52% ( 17)      |
|                         |     | Male                       | 48% (317)      | 48% ( 16)      |
| Race                    | 904 |                            |                | 0.11           |
|                         |     | Amer Indian/Alaska Native  | 0% ( 2)        | 0% ( 0)        |
|                         |     | Asian                      | 3% ( 19)       | 3% ( 1)        |
|                         |     | Black/African American     | 8% ( 51)       | 21% ( 7)       |
|                         |     | Native Hawaii/Pacific Isl. | 0% ( 0)        | 0% ( 0)        |
|                         |     | White                      | 81% (530)      | 70% ( 23)      |
|                         |     | Not disclosed              | 8% ( 54)       | 6% ( 2)        |
| Smoker                  | 890 |                            |                | 0.49           |
|                         |     | Current                    | 13% ( 83)      | 16% ( 5)       |
|                         |     | Former                     | 62% (402)      | 69% ( 22)      |
|                         |     | Never                      | 25% (160)      | 16% ( 5)       |
| Stage at diagnosis      | 887 |                            |                | 0.81           |
|                         |     | I                          | 8% ( 49)       | 9% ( 3)        |
|                         |     | II                         | 7% ( 45)       | 6% ( 2)        |
|                         |     | III                        | 11% ( 72)      | 6% ( 2)        |
|                         |     | IV                         | 74% (479)      | 79% ( 26)      |
| Adrenal metastasis      | 863 |                            |                | <b>0.04</b>    |
|                         |     | No                         | 90% (565)      | 77% ( 24)      |
|                         |     | Yes                        | 10% ( 66)      | 23% ( 7)       |
| Bone metastasis         | 871 |                            |                | 0.81           |
|                         |     | No                         | 69% (440)      | 71% ( 22)      |
|                         |     | Yes                        | 31% (198)      | 29% ( 9)       |
| Brain metastasis        | 869 |                            |                | 0.81           |
|                         |     | No                         | 73% (464)      | 71% ( 22)      |
|                         |     | Yes                        | 27% (172)      | 29% ( 9)       |
| Liver metastasis        | 864 |                            |                | 0.19           |
|                         |     | No                         | 90% (566)      | 97% ( 30)      |
|                         |     | Yes                        | 10% ( 66)      | 3% ( 1)        |
| Lung metastasis         | 882 |                            |                | 0.88           |
|                         |     | No                         | 45% (289)      | 43% ( 13)      |
|                         |     | Yes                        | 55% (357)      | 57% ( 17)      |
| Histopathologic subtype | 788 |                            |                | 0.55           |
|                         |     | Acinar predominant         | 33% (185)      | 17% ( 4)       |
|                         |     | Lepidic predominant        | 2% ( 9)        | 0% ( 0)        |
|                         |     | Micropapillary predom.     | 0% ( 1)        | 0% ( 0)        |
|                         |     | Mucinous                   | 1% ( 4)        | 0% ( 0)        |
|                         |     | Papillary predominant      | 1% ( 4)        | 0% ( 0)        |
|                         |     | Solid predominant          | 64% (359)      | 83% ( 20)      |
| Age at diagnosis        | 887 |                            |                | 0.46           |
|                         |     | (Q1, median, Q3)           | 56.8 63.6 70.2 | 55.7 62.2 69.9 |

# Supplemental Figure 5

## RETr, Positive (%)

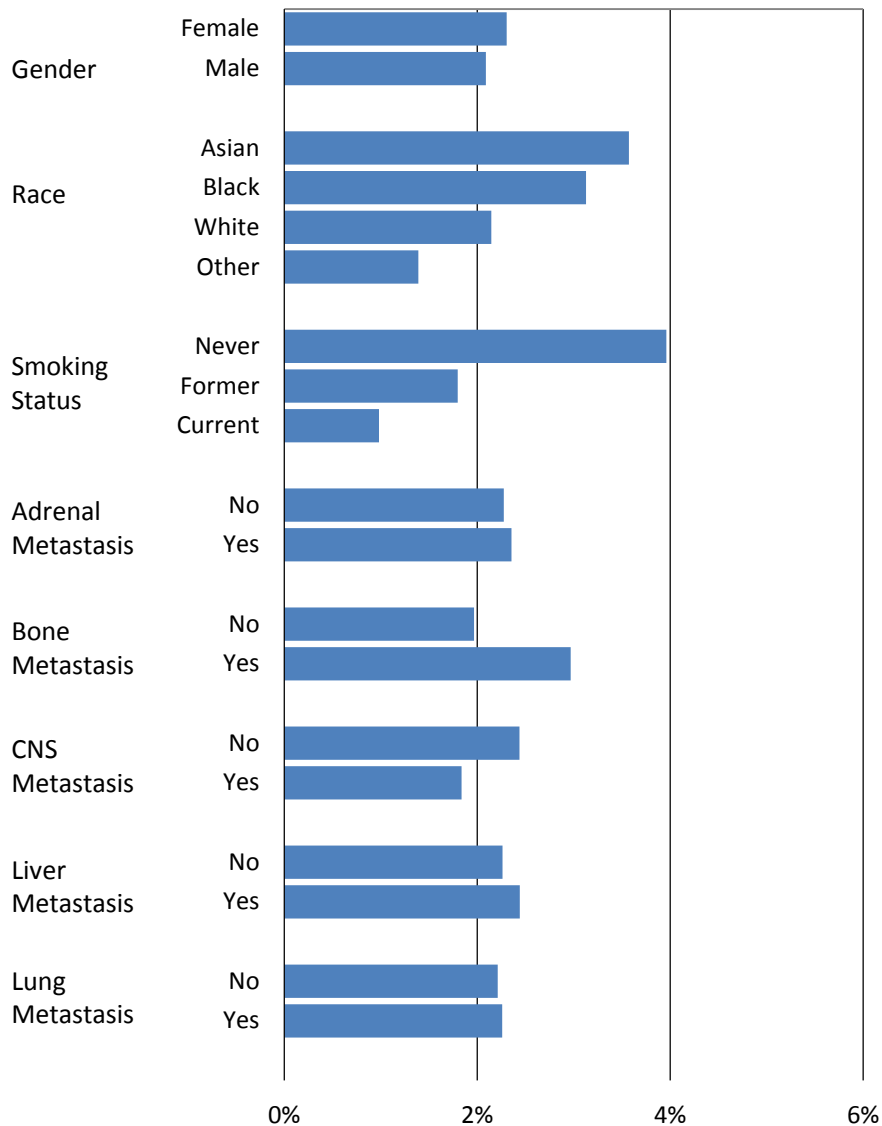

Gene: *RET* (rearrangement) (n=817)

| Variable                   | N   | WT (n=799)     | Mut (n=18)     | P    |
|----------------------------|-----|----------------|----------------|------|
| Sex                        | 904 |                |                | 0.83 |
| Female                     |     | 53% (424)      | 56% ( 10)      |      |
| Male                       |     | 47% (375)      | 44% ( 8)       |      |
| Race                       | 904 |                |                | 0.98 |
| Amer Indian/Alaska Native  |     | 0% ( 2)        | 0% ( 0)        |      |
| Asian                      |     | 3% ( 27)       | 6% ( 1)        |      |
| Black/African American     |     | 8% ( 62)       | 11% ( 2)       |      |
| Native Hawaii/Pacific Isl. |     | 0% ( 1)        | 0% ( 0)        |      |
| White                      |     | 80% (639)      | 78% ( 14)      |      |
| Not disclosed              |     | 9% ( 68)       | 6% ( 1)        |      |
| Smoker                     | 890 |                |                | 0.14 |
| Current                    |     | 13% (101)      | 6% ( 1)        |      |
| Former                     |     | 63% (492)      | 50% ( 9)       |      |
| Never                      |     | 25% (194)      | 44% ( 8)       |      |
| Stage at diagnosis         | 887 |                |                | 0.43 |
| I                          |     | 10% ( 77)      | 11% ( 2)       |      |
| II                         |     | 7% ( 52)       | 11% ( 2)       |      |
| III                        |     | 12% ( 92)      | 0% ( 0)        |      |
| IV                         |     | 72% (568)      | 78% ( 14)      |      |
| Adrenal metastasis         | 863 |                |                | 0.96 |
| No                         |     | 89% (688)      | 89% ( 16)      |      |
| Yes                        |     | 11% ( 83)      | 11% ( 2)       |      |
| Bone metastasis            | 871 |                |                | 0.39 |
| No                         |     | 71% (549)      | 61% ( 11)      |      |
| Yes                        |     | 29% (229)      | 39% ( 7)       |      |
| Brain metastasis           | 869 |                |                | 0.61 |
| No                         |     | 72% (561)      | 78% ( 14)      |      |
| Yes                        |     | 28% (214)      | 22% ( 4)       |      |
| Liver metastasis           | 864 |                |                | 0.92 |
| No                         |     | 90% (692)      | 89% ( 16)      |      |
| Yes                        |     | 10% ( 80)      | 11% ( 2)       |      |
| Lung metastasis            | 882 |                |                | 0.96 |
| No                         |     | 45% (354)      | 44% ( 8)       |      |
| Yes                        |     | 55% (433)      | 56% ( 10)      |      |
| Histopathologic subtype    | 788 |                |                | 0.90 |
| Acinar predominant         |     | 33% (233)      | 21% ( 3)       |      |
| Lepidic predominant        |     | 2% ( 15)       | 0% ( 0)        |      |
| Micropapillary predom.     |     | 0% ( 1)        | 0% ( 0)        |      |
| Mucinous                   |     | 1% ( 5)        | 0% ( 0)        |      |
| Papillary predominant      |     | 0% ( 3)        | 0% ( 0)        |      |
| Solid predominant          |     | 63% (439)      | 79% ( 11)      |      |
| Age at diagnosis           | 887 |                |                | 0.49 |
| (Q1, median, Q3)           |     | 56.7 63.6 70.4 | 58.7 65.1 73.2 |      |

# Supplemental Figure 5

## ROS1r, Positive (%)

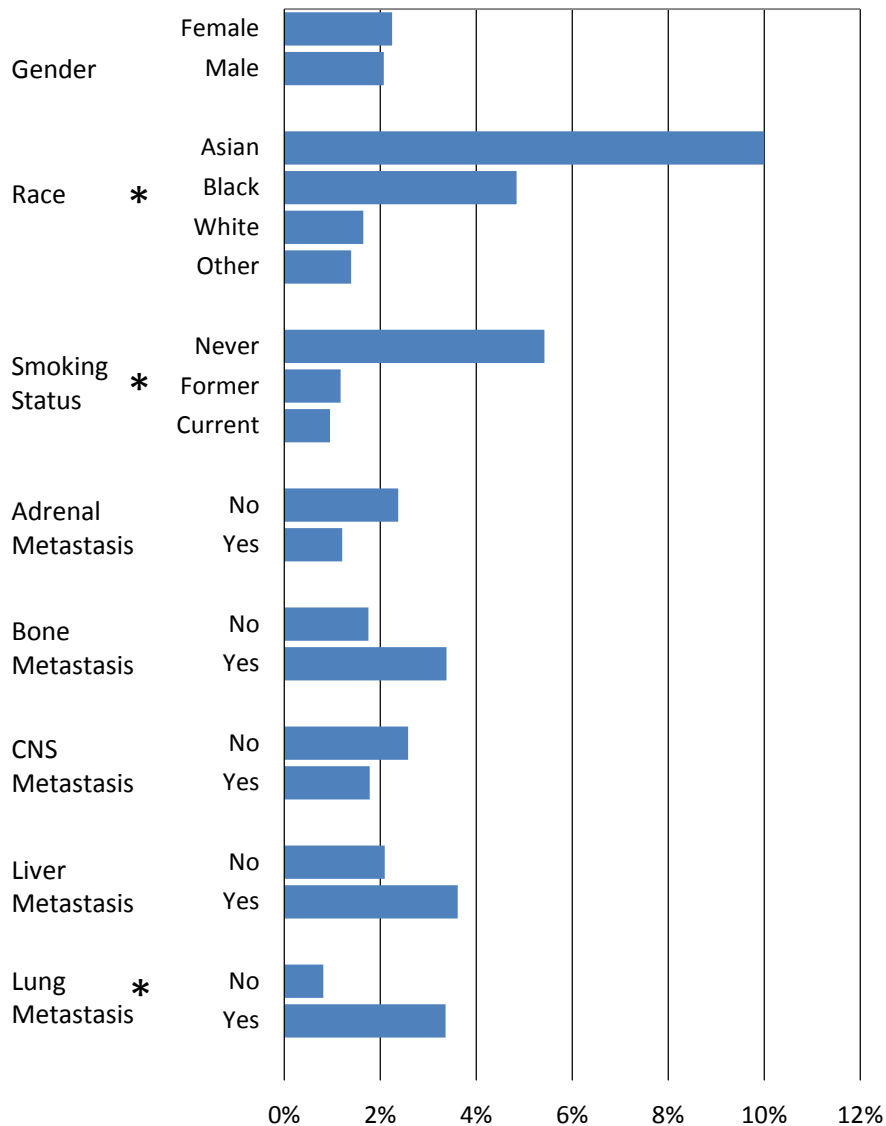

Gene: ROS1 (rearrangement) (n=832)

| Variable                | N                          | WT (n=814)     | Mut (n=18)     | P                |
|-------------------------|----------------------------|----------------|----------------|------------------|
| Sex                     | 904                        |                |                | 0.87             |
|                         | Female                     | 54% (436)      | 56% ( 10)      |                  |
|                         | Male                       | 46% (378)      | 44% ( 8)       |                  |
| Race                    | 904                        |                |                | <b>0.04</b>      |
|                         | Amer Indian/Alaska Native  | 0% ( 2)        | 0% ( 0)        |                  |
|                         | Asian                      | 3% ( 27)       | 17% ( 3)       |                  |
|                         | Black/African American     | 7% ( 59)       | 17% ( 3)       |                  |
|                         | Native Hawaii/Pacific Isl. | 0% ( 1)        | 0% ( 0)        |                  |
|                         | White                      | 81% (657)      | 61% ( 11)      |                  |
|                         | Not disclosed              | 8% ( 68)       | 6% ( 1)        |                  |
| Smoker                  | 890                        |                |                | <b>0.001</b>     |
|                         | Current                    | 13% (104)      | 6% ( 1)        |                  |
|                         | Former                     | 63% (506)      | 33% ( 6)       |                  |
|                         | Never                      | 24% (192)      | 61% ( 11)      |                  |
| Stage at diagnosis      | 887                        |                |                | 0.59             |
|                         | I                          | 10% ( 79)      | 0% ( 0)        |                  |
|                         | II                         | 7% ( 53)       | 6% ( 1)        |                  |
|                         | III                        | 12% ( 93)      | 12% ( 2)       |                  |
|                         | IV                         | 72% (579)      | 82% ( 14)      |                  |
| Adrenal metastasis      | 863                        |                |                | 0.5              |
|                         | No                         | 90% (700)      | 94% ( 17)      |                  |
|                         | Yes                        | 10% ( 82)      | 6% ( 1)        |                  |
| Bone metastasis         | 871                        |                |                | 0.15             |
|                         | No                         | 71% (561)      | 56% ( 10)      |                  |
|                         | Yes                        | 29% (229)      | 44% ( 8)       |                  |
| Brain metastasis        | 869                        |                |                | 0.59             |
|                         | No                         | 72% (567)      | 78% ( 14)      |                  |
|                         | Yes                        | 28% (221)      | 22% ( 4)       |                  |
| Liver metastasis        | 864                        |                |                | 0.38             |
|                         | No                         | 90% (703)      | 83% ( 15)      |                  |
|                         | Yes                        | 10% ( 80)      | 17% ( 3)       |                  |
| Lung metastasis         | 882                        |                |                | <b>0.01</b>      |
|                         | No                         | 46% (366)      | 17% ( 3)       |                  |
|                         | Yes                        | 54% (432)      | 83% ( 15)      |                  |
| Histopathologic subtype | 788                        |                |                | <b>&lt;0.001</b> |
|                         | Acinar predominant         | 33% (230)      | 35% ( 6)       |                  |
|                         | Lepidic predominant        | 2% ( 15)       | 0% ( 0)        |                  |
|                         | Micropapillary predom.     | 0% ( 0)        | 6% ( 1)        |                  |
|                         | Mucinous                   | 1% ( 5)        | 0% ( 0)        |                  |
|                         | Papillary predominant      | 1% ( 4)        | 0% ( 0)        |                  |
|                         | Solid predominant          | 64% (450)      | 59% ( 10)      |                  |
| Age at diagnosis        | 887                        |                |                | <b>0.03</b>      |
|                         | (Q1, median, Q3)           | 56.7 63.8 70.5 | 51.0 57.8 67.4 |                  |

# Supplemental Figure 5

## PTEN loss by IHC, Positive(%)

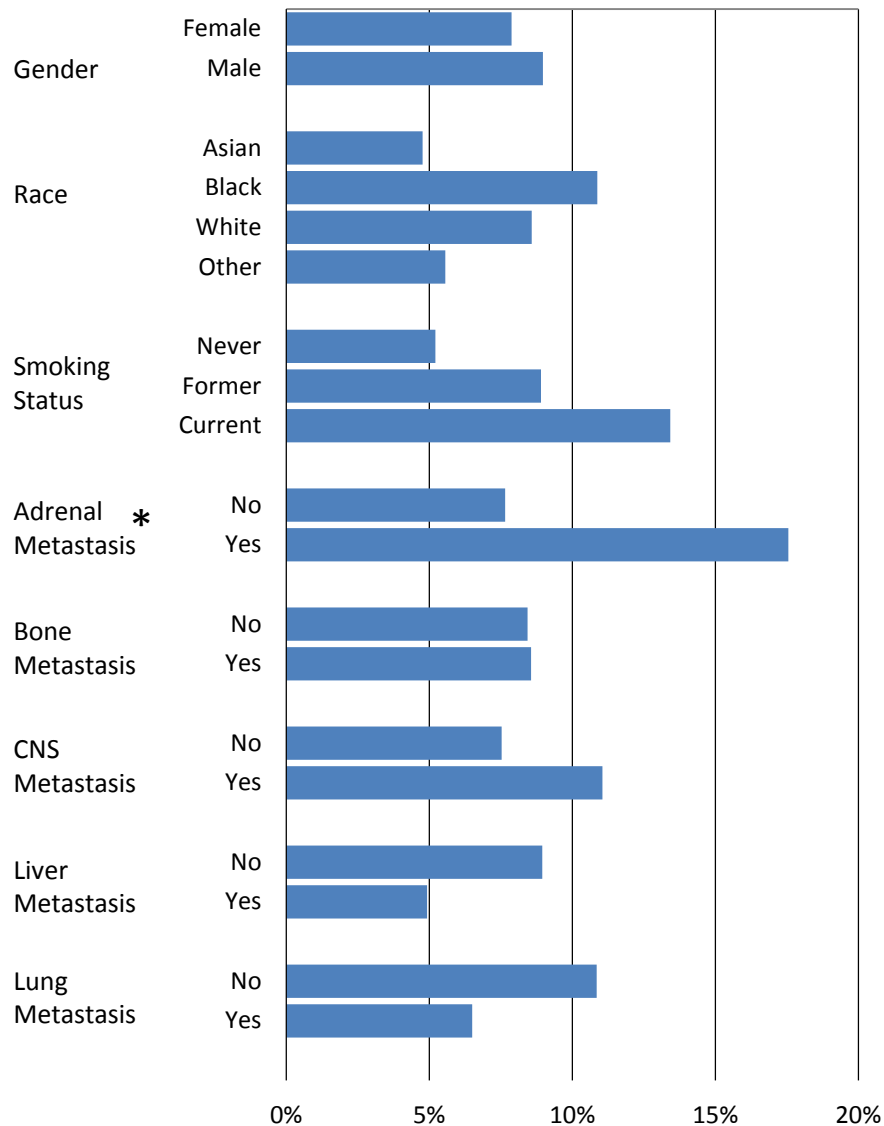

Gene: PTEN (IHC loss) (n=646)

| Variable                | N   | WT (n=592)                 | Mut (n=54)     | P              |
|-------------------------|-----|----------------------------|----------------|----------------|
| Sex                     | 904 |                            |                | 0.62           |
|                         |     | Female                     | 55% (328)      | 52% (28)       |
|                         |     | Male                       | 45% (264)      | 48% (26)       |
| Race                    | 904 |                            |                | 0.92           |
|                         |     | Amer Indian/Alaska Native  | 0% (2)         | 0% (0)         |
|                         |     | Asian                      | 3% (20)        | 2% (1)         |
|                         |     | Black/African American     | 7% (41)        | 9% (5)         |
|                         |     | Native Hawaii/Pacific Isl. | 0% (1)         | 0% (0)         |
|                         |     | White                      | 81% (480)      | 83% (45)       |
|                         |     | Not disclosed              | 8% (48)        | 6% (3)         |
| Smoker                  | 890 |                            |                | 0.08           |
|                         |     | Current                    | 12% (71)       | 20% (11)       |
|                         |     | Former                     | 60% (348)      | 63% (34)       |
|                         |     | Never                      | 28% (164)      | 17% (9)        |
| Stage at diagnosis      | 887 |                            |                | <b>0.03</b>    |
|                         |     | I                          | 11% (65)       | 2% (1)         |
|                         |     | II                         | 8% (44)        | 4% (2)         |
|                         |     | III                        | 11% (63)       | 20% (11)       |
|                         |     | IV                         | 71% (413)      | 74% (40)       |
| Adrenal metastasis      | 863 |                            |                | <b>0.01</b>    |
|                         |     | No                         | 92% (519)      | 81% (43)       |
|                         |     | Yes                        | 8% (47)        | 19% (10)       |
| Bone metastasis         | 871 |                            |                | 0.96           |
|                         |     | No                         | 70% (402)      | 70% (37)       |
|                         |     | Yes                        | 30% (171)      | 30% (16)       |
| Brain metastasis        | 869 |                            |                | 0.16           |
|                         |     | No                         | 73% (418)      | 64% (34)       |
|                         |     | Yes                        | 27% (153)      | 36% (19)       |
| Liver metastasis        | 864 |                            |                | 0.29           |
|                         |     | No                         | 90% (509)      | 94% (50)       |
|                         |     | Yes                        | 10% (58)       | 6% (3)         |
| Lung metastasis         | 882 |                            |                | 0.05           |
|                         |     | No                         | 45% (263)      | 59% (32)       |
|                         |     | Yes                        | 55% (317)      | 41% (22)       |
| Histopathologic subtype | 788 |                            |                | 0.11           |
|                         |     | Acinar predominant         | 33% (175)      | 15% (7)        |
|                         |     | Lepidic predominant        | 2% (12)        | 0% (0)         |
|                         |     | Micropapillary predom.     | 0% (1)         | 0% (0)         |
|                         |     | Mucinous                   | 1% (3)         | 0% (0)         |
|                         |     | Papillary predominant      | 1% (3)         | 0% (0)         |
|                         |     | Solid predominant          | 63% (336)      | 85% (39)       |
| Age at diagnosis        | 887 |                            |                | 0.92           |
|                         |     | (Q1, median, Q3)           | 56.2 63.5 70.7 | 57.3 64.7 68.9 |

# Supplemental Figure 6

*sEGFR* survival comparison according to targeted treatment (Ttx) or not.

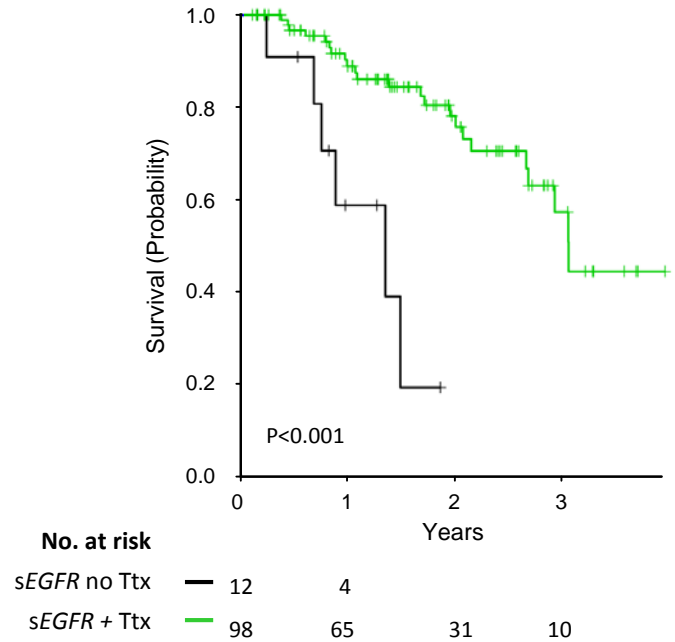

# Supplemental Figure 7

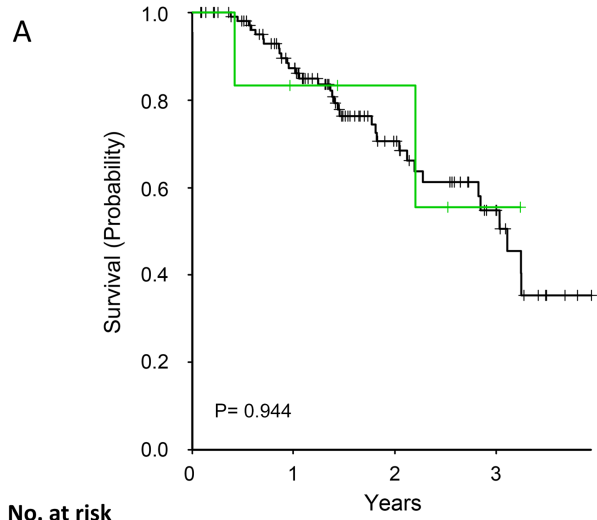

| No. at risk               |   | 0   | 1  | 2  | 3 |
|---------------------------|---|-----|----|----|---|
| PTEN expression by IHC    | — | 110 | 70 | 28 | 9 |
| No PTEN expression by IHC | — | 6   | 4  | 3  | 1 |

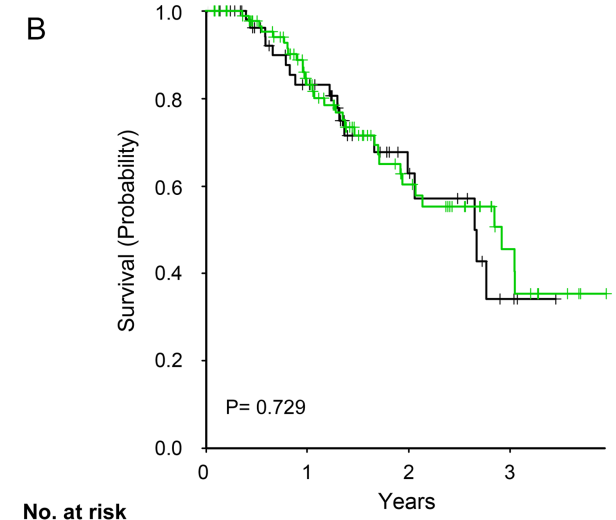

| No. at risk              |   | 0  | 1  | 2  | 3 |
|--------------------------|---|----|----|----|---|
| MET expression by IHC    | — | 57 | 36 | 12 | 3 |
| No MET expression by IHC | — | 93 | 57 | 25 | 9 |

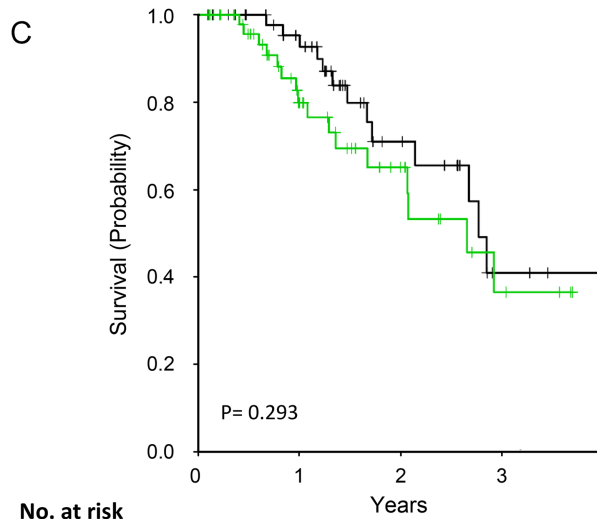

| No. at risk                |   | 0  | 1  | 2  | 3 |
|----------------------------|---|----|----|----|---|
| No <i>PTEN/PIK3CA/TP53</i> | — | 51 | 36 | 14 | 3 |
| + <i>PTEN/PIK3CA/TP53</i>  | — | 52 | 26 | 12 | 4 |

Comparison of survival in the targeted therapy cohort according to presence or absence of several molecular features



# Supplemental Figure 8

Survival comparisons according to presence or absence of TP53 mutation.

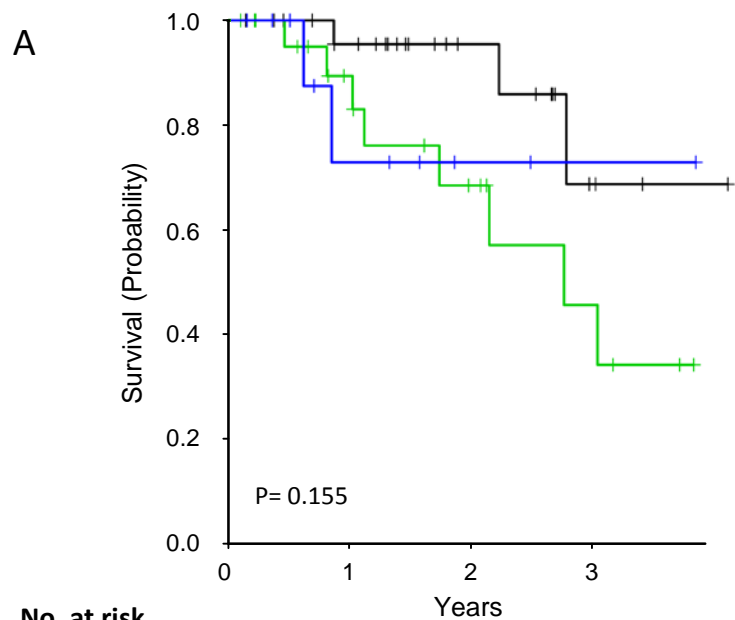

**No. at risk**

|                                            |    |    |    |   |
|--------------------------------------------|----|----|----|---|
| <i>sEGFR</i> Ttx No <i>TP53</i>            | 26 | 20 | 10 | 2 |
| <i>sEGFR</i> Ttx <i>TP53</i> disruptive    | 23 | 12 | 7  | 3 |
| <i>sEGFR</i> Ttx <i>TP53</i> nondisruptive | 11 | 5  | 2  | 1 |

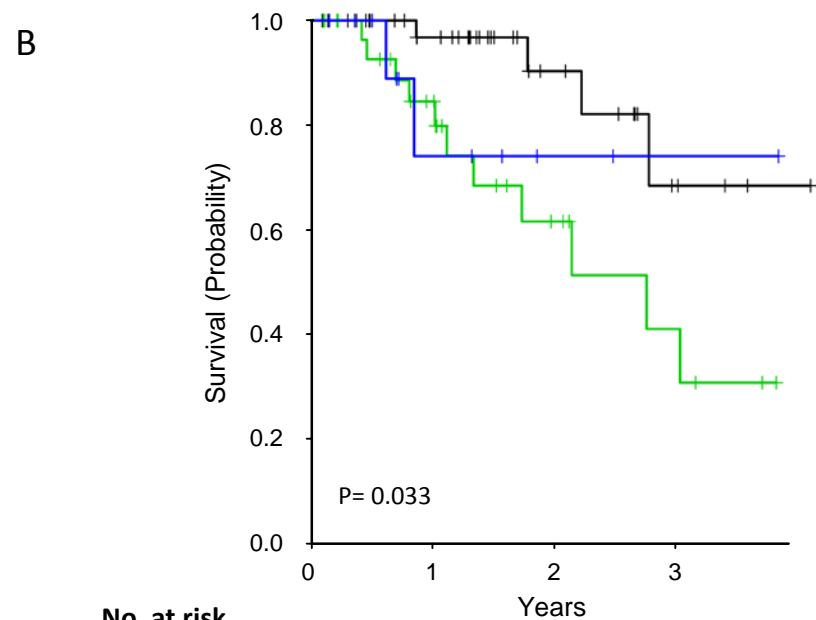

**No. at risk**

|                                      |    |    |    |   |
|--------------------------------------|----|----|----|---|
| Driver Ttx No <i>TP53</i>            | 40 | 28 | 12 | 3 |
| Driver Ttx <i>TP53</i> disruptive    | 31 | 15 | 7  | 3 |
| Driver Ttx <i>TP53</i> nondisruptive | 12 | 5  | 2  | 1 |
